# Supplementary material for: Nicotinamide Inhibits Vasculogenic Mimicry, an Alternative Vascularization Pathway Observed in Highly Aggressive Melanoma
Source: PLoS One. 2013 Feb 25;8(2):e57160. doi: 10.1371/journal.pone.0057160 (PMC3581583; doi:10.1371/journal.pone.0057160)
Supplement: Table S2 — Comparative whole genome expression microarray. HAG cell line treated with 20 mM NA compared to vehicle-treated cells. (XLS) [file pone.0057160.s002.xls]

## Sheet: gili _sept2011_chemo vs C 2FC_1
	Table S2. Whole genome expression microarray of Nictineamide treated HAG cellls as compared to control.
ID	gene_assignment	Gene Symbol	RefSeq	Fold-Change(C499 vs. C498)	C498_Untreated_LIN	C499_Treat_LIN
7965224	NR_002716 // RNU2 // RNA, U2 small nuclear // 17q12-q21 // 6066	RNU2	NR_002716	-2.00616	27.1859	13.5512
8059580	NM_139072 // DNER // delta/notch-like EGF repeat containing // 2q36.3 // 92737	DNER	NM_139072	2.91531	23.2054	67.6508
7928489	---		---	-2.03535	95.18	46.7634
8049961	XR_015566 // LOC728323 // similar to F-box only protein 25 isoform 2 // 2q37.3 /	LOC728323	XR_015566	-2.08056	174.411	83.829
8031999	NM_177543 // PPAP2C // phosphatidic acid phosphatase type 2C // 19p13 // 8612 //	PPAP2C	NM_177543	-2.1434	101.732	47.463
7918487	NM_024901 // DENND2D // DENN/MADD domain containing 2D // 1p13.3 // 79961 /// AK	DENND2D	NM_024901	-2.57841	39.0832	15.1579
8122396	NM_016108 // AIG1 // androgen-induced 1 // 6q24.2 // 51390 /// AF151861 // AIG1	AIG1	NM_016108	-2.3709	259.392	109.407
8117018	---		---	-2.94111	100.636	34.2168
8111552	BC045565 // C5orf33 // chromosome 5 open reading frame 33 // 5p13.2 // 133686 //	C5orf33	BC045565	-2.17934	305.176	140.032
7903414	XM_001127749 // LOC730924 // similar to Pancreatic alpha-amylase precursor (PA)	LOC730924	XM_001127749	-3.18816	51.408	16.1246
8140709	NM_152748 // KIAA1324L // KIAA1324-like // 7q21.12 // 222223	KIAA1324L	NM_152748	-2.10416	149.523	71.061
8051985	---		---	2.09488	19.9454	41.7831
8056408	NM_004482 // GALNT3 // UDP-N-acetyl-alpha-D-galactosamine:polypeptide N-acetylga	GALNT3	NM_004482	-2.37911	25.7882	10.8394
8085579	---		---	2.23572	10.1218	22.6296
8120756	---		---	3.13394	8.56796	26.8515
7943715	AK095101 // ZC3H12C // zinc finger CCCH-type containing 12C // 11q22.3 // 85463	ZC3H12C	AK095101	-2.35844	205.669	87.2056
7981943	NR_001294 // SNRPN // small nuclear ribonucleoprotein polypeptide N // 15q11.2 /	SNRPN	NR_001294	-2.00186	66.2515	33.0949
7996198	NM_014157 // CCDC113 // coiled-coil domain containing 113 // 16q21 // 29070	CCDC113	NM_014157	-2.88561	38.7399	13.4252
7971461	NM_002298 // LCP1 // lymphocyte cytosolic protein 1 (L-plastin) // 13q14.3 // 39	LCP1	NM_002298	-6.45595	126.352	19.5715
7969861	NM_004791 // ITGBL1 // integrin, beta-like 1 (with EGF-like repeat domains) // 1	ITGBL1	NM_004791	-2.25988	37.2045	16.463
8116956	NM_012241 // SIRT5 // sirtuin (silent mating type information regulation 2 homol	SIRT5	NM_012241	-2.1809	78.1836	35.8492
8084219	NM_017644 // KLHL24 // kelch-like 24 (Drosophila) // 3q27.1 // 54800 /// NM_0180	KLHL24	NM_017644	-2.1718	299.1	137.72
7974835	NM_006255 // PRKCH // protein kinase C, eta // 14q22-q23 // 5583 /// AK093241 //	PRKCH	NM_006255	-3.58459	36.8511	10.2804
7903425	NM_020978 // AMY2B // amylase, alpha 2B (pancreatic) // 1p21 // 280 /// XM_00112	AMY2B	NM_020978	-2.36397	40.7522	17.2389
7903440	XM_001127749 // LOC730924 // similar to Pancreatic alpha-amylase precursor (PA)	LOC730924	XM_001127749	-2.36397	40.7522	17.2389
7918134	XM_001127749 // LOC730924 // similar to Pancreatic alpha-amylase precursor (PA)	LOC730924	XM_001127749	-2.36397	40.7522	17.2389
8032839	NM_032108 // SEMA6B // sema domain, transmembrane domain (TM), and cytoplasmic d	SEMA6B	NM_032108	-2.06777	57.2075	27.6663
8143441	XM_001130020 // KIAA1147 // KIAA1147 // 7q34 // 57189 /// XM_001126074 // KIAA11	KIAA1147	XM_001130020	-2.12252	63.7453	30.0329
8140478	AK026747 // LOC54103 // hypothetical protein LOC54103 // 7q11.23 // 54103 /// AK	LOC54103	AK026747	-2.79084	52.7968	18.9179
8098985	NM_181808 // POLN // polymerase (DNA directed) nu // 4p16.3 // 353497 /// BC0036	POLN	NM_181808	2.02507	52.7324	106.787
7995382	NM_001031835 // PHKB // phosphorylase kinase, beta // 16q12-q13 // 5257 /// NM_0	PHKB	NM_001031835	-2.13963	427.448	199.777
7969129	NM_001040444 // PHF11 // PHD finger protein 11 // 13q14.3 // 51131 /// NM_001040	PHF11	NM_001040444	-2.47717	50.596	20.425
8111941	NM_002130 // HMGCS1 // 3-hydroxy-3-methylglutaryl-Coenzyme A synthase 1 (soluble	HMGCS1	NM_002130	-5.94118	727.266	122.411
7965206	NM_182767 // SLC6A15 // solute carrier family 6, member 15 // 12q21.3 // 55117 /	SLC6A15	NM_182767	-2.68612	231.592	86.2178
8146967	NM_031461 // CRISPLD1 // cysteine-rich secretory protein LCCL domain containing	CRISPLD1	NM_031461	-2.16371	137.07	63.3495
8088458	NM_002012 // FHIT // fragile histidine triad gene // 3p14.2 // 2272	FHIT	NM_002012	-2.14732	43.6909	20.3467
8098041	BC036551 // TMEM144 // transmembrane protein 144 // 4q32.1 // 55314 /// BC054487	TMEM144	BC036551	-2.41078	62.6593	25.9913
8147461	NM_002998 // SDC2 // syndecan 2 (heparan sulfate proteoglycan 1, cell surface-as	SDC2	NM_002998	2.66713	14.4129	38.4411
8080144	NM_001003931 // PARP3 // poly (ADP-ribose) polymerase family, member 3 // 3p21.3	PARP3	NM_001003931	-2.79195	60.3583	21.6187
8044882	NM_020909 // EPB41L5 // erythrocyte membrane protein band 4.1 like 5 // 2q14.2 /	EPB41L5	NM_020909	3.16073	23.5754	74.5154
7981427	NM_001823 // CKB // creatine kinase, brain // 14q32 // 1152 /// CR592666 // CKB	CKB	NM_001823	-2.17662	37.1142	17.0513
8152976	BC105783 // TMEM71 // transmembrane protein 71 // 8q24.22 // 137835 /// NM_14464	TMEM71	BC105783	-2.74142	276.88	100.999
7922889	NM_006469 // IVNS1ABP // influenza virus NS1A binding protein // 1q25.1-q31.1 //	IVNS1ABP	NM_006469	-2.02319	592.498	292.854
8070961	NM_001001438 // LSS // lanosterol synthase (2,3-oxidosqualene-lanosterol cyclase	LSS	NM_001001438	-2.45664	116.861	47.5693
8010978	---		---	11.7141	27.0387	316.733
8131042	---		---	-2.17494	46.4945	21.3773
7953442	NM_019858 // GPR162 // G protein-coupled receptor 162 // 12p13 // 27239 /// NM_0	GPR162	NM_019858	-2.4717	24.7525	10.0144
7929256	---		---	-2.12821	65.9044	30.9671
8157463	NM_153045 // C9orf91 // chromosome 9 open reading frame 91 // 9q32 // 203197 ///	C9orf91	NM_153045	-2.05274	55.3492	26.9636
8160274	BC020879 // MGC24103 // hypothetical protein MGC24103 // 9p22.3 // 158295	MGC24103	BC020879	-2.22144	31.6045	14.2271
8106516	NM_152405 // JMY // junction-mediating and regulatory protein // 5q14.1 // 13374	JMY	NM_152405	-2.08881	59.5883	28.5274
8060897	NM_000933 // PLCB4 // phospholipase C, beta 4 // 20p12 // 5332 /// NM_182797 //	PLCB4	NM_000933	-4.97546	280.77	56.431
7899909	---		---	-2.65005	14.9644	5.64684
7944931	NM_198277 // SLC37A2 // solute carrier family 37 (glycerol-3-phosphate transport	SLC37A2	NM_198277	-8.36048	147.631	17.6583
7974687	---		---	2.4496	12.7232	31.1667
8113491	NM_139164 // STARD4 // START domain containing 4, sterol regulated // 5q22.1 //	STARD4	NM_139164	-2.6156	761.904	291.293
8110032	BX647573 // LOC153222 // adult retina protein // 5q35.2 // 153222 /// BX647768 /	LOC153222	BX647573	-2.06755	54.4923	26.3559
8014903	NM_018530 // GSDML // gasdermin-like // 17q12 // 55876 /// NM_001042471 // GSDML	GSDML	NM_018530	-3.06978	52.8119	17.2038
8055465	NM_001008540 // CXCR4 // chemokine (C-X-C motif) receptor 4 // 2q21 // 7852 ///	CXCR4	NM_001008540	3.45617	13.5272	46.7523
7928534	NM_032024 // C10orf11 // chromosome 10 open reading frame 11 // 10q22.2-q22.3 //	C10orf11	NM_032024	-2.00056	34.3458	17.1681
7944656	NM_006918 // SC5DL // sterol-C5-desaturase (ERG3 delta-5-desaturase homolog, fun	SC5DL	NM_006918	-3.22283	380.13	117.949
8121214	---		---	2.08077	9.02127	18.7711
8141206	NM_018842 // BAIAP2L1 // BAI1-associated protein 2-like 1 // 7q21.3 // 55971 ///	BAIAP2L1	NM_018842	-2.68663	27.2801	10.154
8143341	NM_030647 // KIAA1718 // KIAA1718 protein // 7q34 // 80853	KIAA1718	NM_030647	-2.66879	32.5937	12.2129
8009443	NM_014960 // ARSG // arylsulfatase G // 17q24.2 // 22901 /// AY358380 // ARSG //	ARSG	NM_014960	-2.23721	52.982	23.6822
8137639	NM_018051 // WDR60 // WD repeat domain 60 // 7q36.3 // 55112 /// CR627036 // WDR	WDR60	NM_018051	-2.174	40.6011	18.6758
7938390	NM_001124 // ADM // adrenomedullin // 11p15.4 // 133 /// BC015961 // ADM // adre	ADM	NM_001124	-2.57573	390.594	151.644
7997453	NM_002661 // PLCG2 // phospholipase C, gamma 2 (phosphatidylinositol-specific) /	PLCG2	NM_002661	-2.16017	203.344	94.1332
8071981	AB051458 // CTA-221G9.4 // KIAA1671 protein // --- // 85379 /// XM_371461 // CTA	CTA-221G9.4	AB051458	-2.99434	83.6196	27.9259
7912701	NM_182623 // C1orf117 // chromosome 1 open reading frame 117 // 1p36.13 // 34848	C1orf117	NM_182623	-2.02414	14.595	7.21047
8067279	NM_001336 // CTSZ // cathepsin Z // 20q13 // 1522 /// BC025419 // CTSZ // cathep	CTSZ	NM_001336	-2.17594	378.328	173.869
8097657	NM_001003688 // SMAD1 // SMAD family member 1 // 4q31 // 4086 /// NM_005900 // S	SMAD1	NM_001003688	-2.24166	73.9361	32.9827
7923131	NM_144977 // DENND1B // DENN/MADD domain containing 1B // 1q31.3 // 163486 /// B	DENND1B	NM_144977	-2.88715	74.6299	25.849
7949503	NM_016938 // EFEMP2 // EGF-containing fibulin-like extracellular matrix protein	EFEMP2	NM_016938	-3.89441	105.587	27.1124
8127498	---		---	-2.7181	58.1325	21.3872
7977273	NM_152328 // ADSSL1 // adenylosuccinate synthase like 1 // 14q32.33 // 122622 //	ADSSL1	NM_152328	-3.14349	41.8759	13.3215
8166784	NM_004615 // TSPAN7 // tetraspanin 7 // Xp11.4 // 7102	TSPAN7	NM_004615	2.26265	10.7115	24.2363
7902290	NM_001902 // CTH // cystathionase (cystathionine gamma-lyase) // 1p31.1 // 1491	CTH	NM_001902	-2.4277	37.7944	15.568
8039340	NM_003283 // TNNT1 // troponin T type 1 (skeletal, slow) // 19q13.4 // 7138 ///	TNNT1	NM_003283	-2.82024	52.788	18.7175
7972487	NM_015296 // DOCK9 // dedicator of cytokinesis 9 // 13q32.3 // 23348 /// AK09079	DOCK9	NM_015296	-2.15215	265.756	123.484
8121212	NM_020139 // BDH2 // 3-hydroxybutyrate dehydrogenase, type 2 // 4q24 // 56898 //	BDH2	NM_020139	-2.37403	31.7563	13.3766
8141150	NM_133436 // ASNS // asparagine synthetase // 7q21.3 // 440 /// NM_183356 // ASN	ASNS	NM_133436	-2.85937	337.621	118.075
8097335	NM_014278 // HSPA4L // heat shock 70kDa protein 4-like // 4q28 // 22824	HSPA4L	NM_014278	2.28331	183.182	418.262
8116998	NM_004973 // JARID2 // jumonji, AT rich interactive domain 2 // 6p24-p23 // 3720	JARID2	NM_004973	-2.47931	148.495	59.8937
8151457	NM_012258 // HEY1 // hairy/enhancer-of-split related with YRPW motif 1 // 8q21 /	HEY1	NM_012258	-2.55394	55.1759	21.6043
8146711	BC014448 // C8orf44 // chromosome 8 open reading frame 44 // 8q13.1 // 56260 ///	C8orf44	BC014448	-2.21181	76.1989	34.451
8077899	NM_138711 // PPARG // peroxisome proliferator-activated receptor gamma // 3p25 /	PPARG	NM_138711	-2.55788	45.411	17.7534
7966223	---		---	-2.79956	33.023	11.7958
8096335	NM_017912 // HERC6 // hect domain and RLD 6 // 4q22.1 // 55008 /// AK092403 // H	HERC6	NM_017912	-2.023	51.8569	25.6337
7923141	NM_144977 // DENND1B // DENN/MADD domain containing 1B // 1q31.3 // 163486 /// B	DENND1B	NM_144977	-2.30163	70.3973	30.5858
8088895	NM_201598 // FAM86A // family with sequence similarity 86, member A // 16p13.3 /	FAM86A	NM_201598	-2.18547	67.6325	30.9464
8116245	BC063116 // CLK4 // CDC-like kinase 4 // 5q35 // 57396 /// CR749504 // CLK4 // C	CLK4	BC063116	-2.1957	33.9286	15.4523
7903407	NM_020978 // AMY2B // amylase, alpha 2B (pancreatic) // 1p21 // 280 /// AK127047	AMY2B	NM_020978	-2.12375	49.2973	23.2124
8097064	XR_015440 // LOC729055 // hypothetical protein LOC729055 // 19p13.3 // 729055 //	LOC729055	XR_015440	-2.03149	80.1365	39.4472
7913566	NM_000864 // HTR1D // 5-hydroxytryptamine (serotonin) receptor 1D // 1p36.3-p34.	HTR1D	NM_000864	-2.38413	38.8235	16.2842
8156043	NM_021154 // PSAT1 // phosphoserine aminotransferase 1 // 9q21.2 // 29968 /// NM	PSAT1	NM_021154	-2.63615	1089.26	413.203
8166593	NM_014271 // IL1RAPL1 // interleukin 1 receptor accessory protein-like 1 // Xp22	IL1RAPL1	NM_014271	2.16587	12.1391	26.2917
8165911	NM_005647 // TBL1X // transducin (beta)-like 1X-linked // Xp22.3 // 6907 /// BC0	TBL1X	NM_005647	-2.02949	72.0676	35.5102
8044295	XM_938910 // SH3MD4 // SH3 multiple domains 4 // 2q13 // 344558 /// XM_293090 //	SH3MD4	XM_938910	-2.75787	49.6747	18.012
7924758	XM_372816 // LOC391169 // hypothetical LOC391169 // 1q42.12 // 391169 /// XM_938	LOC391169	XM_372816	-2.28693	33.8294	14.7925
7996917	---		---	2.62781	16.9442	44.5261
8037621	NM_012155 // EML2 // echinoderm microtubule associated protein like 2 // 19q13.3	EML2	NM_012155	-2.48177	76.8365	30.9604
8106722	NM_001017971 // LOC92270 // hypothetical protein LOC92270 // 5q14.2 // 92270	LOC92270	NM_001017971	-2.09407	32.8561	15.69
7979400	BX649130 // C14orf37 // chromosome 14 open reading frame 37 // 14q23.1 // 145407	C14orf37	BX649130	2.05396	17.4042	35.7475
8072108	NM_020437 // ASPHD2 // aspartate beta-hydroxylase domain containing 2 // 22q12.1	ASPHD2	NM_020437	-2.14554	27.7622	12.9395
7946661	NM_015881 // DKK3 // dickkopf homolog 3 (Xenopus laevis) // 11p15.2 // 27122 ///	DKK3	NM_015881	-2.07613	59.4261	28.6235
8104107	AY435043 // FLJ25801 // hypothetical protein FLJ25801 // 4q35.2 // 205860 /// NM	FLJ25801	AY435043	-4.76784	297.315	62.3584
8101762	NM_000345 // SNCA // synuclein, alpha (non A4 component of amyloid precursor) //	SNCA	NM_000345	-2.30552	73.6654	31.9518
7977497	NM_182852 // CCNB1IP1 // cyclin B1 interacting protein 1 // 14q11.2 // 57820 ///	CCNB1IP1	NM_182852	-2.33005	78.4903	33.6861
7994981	---		---	-2.12414	56.1468	26.4328
7971573	NM_001268 // RCBTB2 // regulator of chromosome condensation (RCC1) and BTB (POZ)	RCBTB2	NM_001268	2.61959	32.1382	84.1889
8099721	AK123293 // KIAA0746 // KIAA0746 protein // 4p15.2 // 23231 /// BC041046 // KIAA	KIAA0746	AK123293	-3.8913	331.31	85.1413
8150881	NM_002655 // PLAG1 // pleiomorphic adenoma gene 1 // 8q12 // 5324 /// XM_0011264	PLAG1	NM_002655	-2.33116	111.292	47.741
7935510	BC022054 // C10orf83 // chromosome 10 open reading frame 83 // 10q24.1 // 118812	C10orf83	BC022054	-2.05421	42.5592	20.718
8059350	NM_001039569 // AP1S3 // adaptor-related protein complex 1, sigma 3 subunit // 2	AP1S3	NM_001039569	2.45358	21.0148	51.5613
7919800	NM_004079 // CTSS // cathepsin S // 1q21 // 1520 /// M90696 // CTSS // cathepsin	CTSS	NM_004079	-2.43743	40.4123	16.5799
7949971	NM_001876 // CPT1A // carnitine palmitoyltransferase 1A (liver) // 11q13.1-q13.2	CPT1A	NM_001876	2.30163	18.6748	42.9826
8148501	NM_032611 // PTP4A3 // protein tyrosine phosphatase type IVA, member 3 // 8q24.3	PTP4A3	NM_032611	-3.0961	38.5772	12.4599
8016909	NM_017777 // MKS1 // Meckel syndrome, type 1 // 17q22 // 54903	MKS1	NM_017777	-2.04697	40.1762	19.6271
7988970	AL832519 // KIAA1370 // KIAA1370 // 15q21.2 // 56204 /// NM_019600 // KIAA1370 /	KIAA1370	AL832519	-2.32492	60.9687	26.224
8006634	NM_178517 // PIGW // phosphatidylinositol glycan anchor biosynthesis, class W //	PIGW	NM_178517	2.46257	27.7758	68.3997
8011415	NM_002561 // P2RX5 // purinergic receptor P2X, ligand-gated ion channel, 5 // 17	P2RX5	NM_002561	-2.45761	36.4968	14.8505
8136807	---		---	-2.2118	149.849	67.75
7900336	AK023285 // MACF1 // microtubule-actin crosslinking factor 1 // 1p32-p31 // 2349	MACF1	AK023285	-2.07392	62.8739	30.3165
7912496	NM_005957 // MTHFR // 5,10-methylenetetrahydrofolate reductase (NADPH) // 1p36.3	MTHFR	NM_005957	-3.24853	44.8058	13.7926
7959825	---		---	2.02243	8.34067	16.8684
7920285	NM_005978 // S100A2 // S100 calcium binding protein A2 // 1q21 // 6273 /// BC002	S100A2	NM_005978	-4.118	57.243	13.9007
8152119	NM_001040624 // NCALD // neurocalcin delta // 8q22.2 // 83988 /// NM_001040625 /	NCALD	NM_001040624	-2.01766	23.9936	11.8918
7935707	NM_001278 // CHUK // conserved helix-loop-helix ubiquitous kinase // 10q24-q25 /	CHUK	NM_001278	2.26997	84.2454	191.235
7957551	NM_003877 // SOCS2 // suppressor of cytokine signaling 2 // 12q // 8835 /// AF02	SOCS2	NM_003877	-2.41368	47.8178	19.8112
7949679	NM_006946 // SPTBN2 // spectrin, beta, non-erythrocytic 2 // 11q13 // 6712 /// A	SPTBN2	NM_006946	-2.98624	25.6964	8.60493
7938133	AK125885 // CCDC35 // coiled-coil domain containing 35 // 11p15.4 // 387750 ///	CCDC35	AK125885	-2.0005	59.5678	29.7764
7956908	---		---	-2.42426	23.2621	9.59555
8139840	NM_001007253 // ERV3 // endogenous retroviral sequence 3 (includes zinc finger p	ERV3	NM_001007253	-2.72135	39.3957	14.4765
7898263	NM_017556 // FBLIM1 // filamin binding LIM protein 1 // 1p36.21 // 54751 /// NM_	FBLIM1	NM_017556	-2.24176	33.8547	15.1018
7930498	NM_203380 // ACSL5 // acyl-CoA synthetase long-chain family member 5 // 10q25.1-	ACSL5	NM_203380	-2.58923	136.418	52.6866
7972601	NM_052867 // VGCNL1 // voltage gated channel like 1 // 13q32.3 // 259232 /// BC0	VGCNL1	NM_052867	-2.10734	64.5365	30.6247
7944525	---		---	-2.444	35.2966	14.4422
7934297	---		---	-2.05428	98.867	48.1273
8064894	NM_152611 // C20orf75 // chromosome 20 open reading frame 75 // 20p12.3 // 16431	C20orf75	NM_152611	-2.30332	24.1829	10.4992
7944333	---		---	2.81867	17.7411	50.0063
7973924	AB002389 // KIAA0391 // KIAA0391 // 14q13.2 // 9692 /// BX161487 // KIAA0391 //	KIAA0391	AB002389	-2.11668	134.92	63.7415
7955694	NM_002178 // IGFBP6 // insulin-like growth factor binding protein 6 // 12q13 //	IGFBP6	NM_002178	-2.21202	321.861	145.506
7966600	NM_024959 // SLC24A6 // solute carrier family 24 (sodium/potassium/calcium excha	SLC24A6	NM_024959	-2.22604	144.708	65.0071
8008819	NM_001005404 // YPEL2 // yippee-like 2 (Drosophila) // 17q22 // 388403 /// AK097	YPEL2	NM_001005404	-2.20538	27.7585	12.5868
8069553	NM_003489 // NRIP1 // nuclear receptor interacting protein 1 // 21q11.2 // 8204	NRIP1	NM_003489	-2.75602	441.877	160.331
7950067	NM_001360 // DHCR7 // 7-dehydrocholesterol reductase // 11q13.2-q13.5 // 1717 //	DHCR7	NM_001360	-3.79754	630.326	165.983
7925672	NM_033213 // ZNF670 // zinc finger protein 670 // 1q44 // 93474 /// AK027325 //	ZNF670	NM_033213	-2.79191	79.9893	28.6504
8123598	NM_030666 // SERPINB1 // serpin peptidase inhibitor, clade B (ovalbumin), member	SERPINB1	NM_030666	-2.20829	352.217	159.497
8127109	NM_016513 // ICK // intestinal cell (MAK-like) kinase // 6p12.3-p11.2 // 22858 /	ICK	NM_016513	-2.08799	79.4812	38.0658
7950641	NM_023930 // KCTD14 // potassium channel tetramerisation domain containing 14 //	KCTD14	NM_023930	-2.6994	183.333	67.916
7954631	NM_018099 // MLSTD1 // male sterility domain containing 1 // 12p11.22 // 55711 /	MLSTD1	NM_018099	-4.05131	131.409	32.4362
8031029	---		---	2.00646	10.058	20.181
7956737	---		---	2.3378	50.1053	117.136
7990333	NM_000781 // CYP11A1 // cytochrome P450, family 11, subfamily A, polypeptide 1 /	CYP11A1	NM_000781	-5.10596	45.1663	8.8458
8072360	NM_000355 // TCN2 // transcobalamin II; macrocytic anemia // 22q12.2 // 6948 ///	TCN2	NM_000355	-2.53014	22.4693	8.88064
8004043	NM_001976 // ENO3 // enolase 3 (beta, muscle) // 17pter-p11 // 2027 /// NM_05301	ENO3	NM_001976	-2.35205	23.3288	9.91849
8117435	NM_007047 // BTN3A2 // butyrophilin, subfamily 3, member A2 // 6p22.1 // 11118 /	BTN3A2	NM_007047	-4.00829	123.459	30.8009
8152703	NM_148177 // FBXO32 // F-box protein 32 // 8q24.13 // 114907 /// NM_058229 // FB	FBXO32	NM_148177	-3.95934	162.52	41.0472
8142997	NM_181775 // PLXNA4B // plexin A4, B // 7q32.3 // 91584 /// AK123428 // PLXNA4B	PLXNA4B	NM_181775	2.14718	14.7536	31.6787
8036956	BC090894 // C19orf54 // chromosome 19 open reading frame 54 // 19q13.2 // 284325	C19orf54	BC090894	-2.15105	34.9124	16.2304
8106280	NM_000859 // HMGCR // 3-hydroxy-3-methylglutaryl-Coenzyme A reductase // 5q13.3-	HMGCR	NM_000859	-2.6027	657.933	252.789
7936419	NM_018017 // C10orf118 // chromosome 10 open reading frame 118 // 10q25.3 // 550	C10orf118	NM_018017	-2.16178	67.6532	31.2951
8010354	NM_000152 // GAA // glucosidase, alpha; acid (Pompe disease, glycogen storage di	GAA	NM_000152	-2.23943	34.4509	15.3838
8105191	NM_024615 // PARP8 // poly (ADP-ribose) polymerase family, member 8 // 5q11.1 //	PARP8	NM_024615	-2.70229	162.683	60.2017
7982034	---		---	2.09666	15.9451	33.4315
8148000	NM_001025357 // LOC441376 // AARD protein // 8q24.11 // 441376	LOC441376	NM_001025357	2.19149	15.0069	32.8874
7935553	NM_032211 // LOXL4 // lysyl oxidase-like 4 // 10q24 // 84171	LOXL4	NM_032211	-2.48959	23.5848	9.47334
8125500	NM_000593 // TAP1 // transporter 1, ATP-binding cassette, sub-family B (MDR/TAP)	TAP1	NM_000593	-2.64952	95.9064	36.1977
8178855	NM_000593 // TAP1 // transporter 1, ATP-binding cassette, sub-family B (MDR/TAP)	TAP1	NM_000593	-2.64952	95.9064	36.1977
8180049	NM_000593 // TAP1 // transporter 1, ATP-binding cassette, sub-family B (MDR/TAP)	TAP1	NM_000593	-2.64952	95.9064	36.1977
8135915	NM_013332 // HIG2 // hypoxia-inducible protein 2 // 7q32.1 // 29923 /// BC008573	HIG2	NM_013332	-2.00353	45.8956	22.9074
8008388	NM_022827 // SPATA20 // spermatogenesis associated 20 // 17q21.33 // 64847 /// C	SPATA20	NM_022827	-2.25533	73.0929	32.409
8175261	---		---	-3.99308	87.8961	22.0121
8085797	NM_000461 // THRB // thyroid hormone receptor, beta (erythroblastic leukemia vir	THRB	NM_000461	-2.4541	60.3209	24.5796
8098195	NM_001017369 // SC4MOL // sterol-C4-methyl oxidase-like // 4q32-q34 // 6307 ///	SC4MOL	NM_001017369	-3.96813	1035.87	261.048
8175432	NR_002735 // SNORD61 // small nucleolar RNA, C/D box 61 // Xq26.3 // 26787	SNORD61	NR_002735	2.52407	29.0635	73.3584
7901748	AK090568 // FLJ10986 // hypothetical protein FLJ10986 // 1p32.1 // 55277 /// AK0	FLJ10986	AK090568	-2.26436	43.9786	19.4221
8175016	NM_017413 // APLN // apelin, AGTRL1 ligand // Xq25-26.3 // 8862 /// AY358657 //	APLN	NM_017413	-2.0097	46.2655	23.0212
8092707	NM_018192 // LEPREL1 // leprecan-like 1 // 3q28 // 55214 /// ENSESTT00000046379	LEPREL1	NM_018192	-2.23085	246.207	110.364
8121838	NM_001003396 // TPD52L1 // tumor protein D52-like 1 // 6q22-q23 // 7164 /// NM_0	TPD52L1	NM_001003396	-5.03862	91.6206	18.1837
8044584	NM_012455 // PSD4 // pleckstrin and Sec7 domain containing 4 // 2q13 // 23550 //	PSD4	NM_012455	-2.05779	36.159	17.5717
8076195	NM_033016 // PDGFB // platelet-derived growth factor beta polypeptide (simian sa	PDGFB	NM_033016	-2.61605	30.4613	11.644
7991335	NM_001150 // ANPEP // alanyl (membrane) aminopeptidase (aminopeptidase N, aminop	ANPEP	NM_001150	-3.40679	808.242	237.244
7944096	NM_001077239 // DKFZp547C195 // hypothetical protein DKFZp547C195 // 11q23.3 //	DKFZp547C195	NM_001077239	-2.05426	66.4219	32.3337
8135392	NM_012257 // HBP1 // HMG-box transcription factor 1 // 7q22-q31 // 26959 /// AF1	HBP1	NM_012257	-2.34661	92.8954	39.5871
8155508	---		---	2.0524	7.21842	14.8151
8056060	NM_013450 // BAZ2B // bromodomain adjacent to zinc finger domain, 2B // 2q23-q24	BAZ2B	NM_013450	-2.24282	87.2901	38.9198
7950307	NM_003355 // UCP2 // uncoupling protein 2 (mitochondrial, proton carrier) // 11q	UCP2	NM_003355	-2.87725	59.0435	20.5208
8153304	NM_145003 // TSNARE1 // t-SNARE domain containing 1 // 8q24.3 // 203062	TSNARE1	NM_145003	-2.36681	30.3836	12.8374
7923596	NM_018208 // ETNK2 // ethanolamine kinase 2 // 1q32.1 // 55224 /// BC010082 // E	ETNK2	NM_018208	-2.09149	21.9881	10.5131
8011114	NM_145351 // SCARF1 // scavenger receptor class F, member 1 // 17p13.3 // 8578 /	SCARF1	NM_145351	-2.76701	69.7352	25.2023
8087485	NM_003335 // UBE1L // ubiquitin-activating enzyme E1-like // 3p21 // 7318	UBE1L	NM_003335	-3.12082	56.7743	18.1921
8150428	NM_003012 // SFRP1 // secreted frizzled-related protein 1 // 8p12-p11.1 // 6422	SFRP1	NM_003012	2.77136	97.0885	269.067
8047174	NM_020342 // SLC39A10 // solute carrier family 39 (zinc transporter), member 10	SLC39A10	NM_020342	-2.41283	491.993	203.907
8008185	NM_016428 // ABI3 // ABI gene family, member 3 // 17q21.3 // 51225	ABI3	NM_016428	-2.64252	53.2402	20.1475
8101701	NM_152542 // PPM1K // protein phosphatase 1K (PP2C domain containing) // 4q22.1	PPM1K	NM_152542	-3.17579	45.1019	14.2018
7994609	NM_014298 // QPRT // quinolinate phosphoribosyltransferase (nicotinate-nucleotid	QPRT	NM_014298	-2.73315	319.4	116.861
7951140	---		---	-2.34354	45.3894	19.3679
8117054	NM_006366 // CAP2 // CAP, adenylate cyclase-associated protein, 2 (yeast) // 6p2	CAP2	NM_006366	-2.35853	216.204	91.6689
7992071	NM_013404 // MSLN // mesothelin // 16p13.3 // 10232 /// NM_005823 // MSLN // mes	MSLN	NM_013404	-3.5272	46.2885	13.1233
7995128	NM_000887 // ITGAX // integrin, alpha X (complement component 3 receptor 4 subun	ITGAX	NM_000887	-3.74228	41.3986	11.0624
7981068	NM_001002236 // SERPINA1 // serpin peptidase inhibitor, clade A (alpha-1 antipro	SERPINA1	NM_001002236	-2.21512	38.9604	17.5884
8150364	NM_001024381 // TM2D2 // TM2 domain containing 2 // 8p11.23 // 83877 /// NM_0010	TM2D2	NM_001024381	2.05288	32.0679	65.8317
8062190	NM_003116 // SPAG4 // sperm associated antigen 4 // 20q11.21 // 6676	SPAG4	NM_003116	-2.52389	34.8785	13.8193
8116177	NM_032921 // AGXT2L2 // alanine-glyoxylate aminotransferase 2-like 2 // 5q35.3 /	AGXT2L2	NM_032921	-2.38285	82.3998	34.5803
7915529	NM_031207 // HYI // hydroxypyruvate isomerase homolog (E. coli) // 1p34.2 // 818	HYI	NM_031207	-2.00263	32.0004	15.9791
8007637	NM_001466 // FZD2 // frizzled homolog 2 (Drosophila) // 17q21.1 // 2535	FZD2	NM_001466	-2.08759	20.4715	9.80626
8154100	NM_003383 // VLDLR // very low density lipoprotein receptor // 9p24 // 7436 ///	VLDLR	NM_003383	-2.02033	172.65	85.4563
8148280	NM_003129 // SQLE // squalene epoxidase // 8q24.1 // 6713	SQLE	NM_003129	-2.37886	817.832	343.792
8044333	BC015843 // LIMS1 // LIM and senescent cell antigen-like domains 1 // 2q12.3-q13	LIMS1	BC015843	-2.12014	363.665	171.528
8054519	BC015843 // LIMS1 // LIM and senescent cell antigen-like domains 1 // 2q12.3-q13	LIMS1	BC015843	-2.12014	363.665	171.529
7916493	NM_003713 // PPAP2B // phosphatidic acid phosphatase type 2B // 1pter-p22.1 // 8	PPAP2B	NM_003713	-2.12963	82.6391	38.8045
8130438	NM_016020 // TFB1M // transcription factor B1, mitochondrial // 6q25.1-q25.3 //	TFB1M	NM_016020	-2.03085	229.52	113.017
8102200	NM_014421 // DKK2 // dickkopf homolog 2 (Xenopus laevis) // 4q25 // 27123 /// AB	DKK2	NM_014421	-2.05841	19.3472	9.39908
8120654	NM_019842 // KCNQ5 // potassium voltage-gated channel, KQT-like subfamily, membe	KCNQ5	NM_019842	-2.0292	64.0697	31.5739
8101429	NM_016619 // PLAC8 // placenta-specific 8 // 4q21.22 // 51316 /// BC012205 // PL	PLAC8	NM_016619	-5.66901	360.772	63.6394
8105681	NM_001006600 // ERBB2IP // erbb2 interacting protein // 5q12.3 // 55914 /// NM_0	ERBB2IP	NM_001006600	-2.41637	928.14	384.105
7991374	NM_002168 // IDH2 // isocitrate dehydrogenase 2 (NADP+), mitochondrial // 15q26.	IDH2	NM_002168	-2.04268	112.139	54.8979
8054135	NM_012214 // MGAT4A // mannosyl (alpha-1,3-)-glycoprotein beta-1,4-N-acetylgluco	MGAT4A	NM_012214	2.25262	10.0454	22.6284
7903742	NM_000850 // GSTM4 // glutathione S-transferase M4 // 1p13.3 // 2948 /// NM_1471	GSTM4	NM_000850	-2.05802	15.2337	7.4021
8064868	AL833069 // RP5-1022P6.2 // hypothetical protein KIAA1434 // 20p12.3 // 56261 //	RP5-1022P6.2	AL833069	-2.38861	78.0272	32.6664
7917634	NM_001017975 // HFM1 // HFM1, ATP-dependent DNA helicase homolog (S. cerevisiae)	HFM1	NM_001017975	2.0808	8.45409	17.5912
7962455	NM_006159 // NELL2 // NEL-like 2 (chicken) // 12q13.11-q13.12 // 4753 /// AK0956	NELL2	NM_006159	2.40849	8.91267	21.4661
7965573	NM_021229 // NTN4 // netrin 4 // 12q22-q23 // 59277	NTN4	NM_021229	-2.27607	74.3406	32.6618
8040365	NM_021643 // TRIB2 // tribbles homolog 2 (Drosophila) // 2p25.1-p24.3 // 28951 /	TRIB2	NM_021643	-2.21084	59.2997	26.8222
8020495	NM_138375 // CABLES1 // Cdk5 and Abl enzyme substrate 1 // 18q11.2 // 91768 ///	CABLES1	NM_138375	-2.31229	91.4898	39.5667
7989657	---		---	2.16859	19.6402	42.5914
7926259	NM_018518 // MCM10 // MCM10 minichromosome maintenance deficient 10 (S. cerevisi	MCM10	NM_018518	2.33711	52.0736	121.702
7955562	NM_000020 // ACVRL1 // activin A receptor type II-like 1 // 12q11-q14 // 94 ///	ACVRL1	NM_000020	-2.11791	22.7448	10.7393
7915074	---		---	2.31366	8.18342	18.9337
8132345	---		---	3.52751	12.2096	43.0696
8080168	NM_000666 // ACY1 // aminoacylase 1 // 3p21.1 // 95 /// BC003023 // ACY1 // amin	ACY1	NM_000666	-3.56267	74.6041	20.9405
8103851	---		---	2.30682	12.2015	28.1468
8139017	---		---	2.2719	19.008	43.1843
7923483	NM_002871 // RABIF // RAB interacting factor // 1q32-q41 // 5877 /// BC018488 //	RABIF	NM_002871	2.45521	32.4253	79.611
8148149	NM_014943 // ZHX2 // zinc fingers and homeoboxes 2 // 8q24.13 // 22882	ZHX2	NM_014943	-2.02234	91.3038	45.1475
7903092	NM_017737 // FNBP1L // formin binding protein 1-like // 1p22.1 // 54874 /// NM_0	FNBP1L	NM_017737	-2.14836	111.992	52.129
8098611	NM_003265 // TLR3 // toll-like receptor 3 // 4q35 // 7098 /// BC043204 // TLR3 /	TLR3	NM_003265	-2.002	38.5257	19.2436
7953943	NM_031412 // GABARAPL1 // GABA(A) receptor-associated protein like 1 // 12p13.2	GABARAPL1	NM_031412	-2.07707	84.9371	40.8928
8025255	NM_006949 // STXBP2 // syntaxin binding protein 2 // 19p13.3-p13.2 // 6813 /// A	STXBP2	NM_006949	-2.44229	106.317	43.5316
8156706	NM_003275 // TMOD1 // tropomodulin 1 // 9q22.3 // 7111 /// BC002660 // TMOD1 //	TMOD1	NM_003275	2.17434	11.8796	25.8302
7956426	NM_031479 // INHBE // inhibin, beta E // 12q13.3 // 83729	INHBE	NM_031479	-2.87522	32.6073	11.3408
8070632	NM_000071 // CBS // cystathionine-beta-synthase // 21q22.3 // 875 /// BC010242 /	CBS	NM_000071	-2.86652	134.657	46.9759
8066303	NM_032221 // CHD6 // chromodomain helicase DNA binding protein 6 // 20q12 // 841	CHD6	NM_032221	-2.01309	114.925	57.0889
7901993	NM_020925 // CACHD1 // cache domain containing 1 // 1p31.3 // 57685 /// BC039301	CACHD1	NM_020925	2.54197	19.6935	50.0602
7958262	NM_152772 // TCP11L2 // t-complex 11 (mouse)-like 2 // 12q23.3 // 255394 /// CR6	TCP11L2	NM_152772	-5.06054	185.048	36.5669
7983775	---		---	2.01019	9.10376	18.3003
8120176	NM_153344 // C6orf141 // chromosome 6 open reading frame 141 // 6p12.3 // 135398	C6orf141	NM_153344	-2.33494	48.32	20.6943
8036710	NM_004877 // GMFG // glia maturation factor, gamma // 19q13.2 // 9535 /// BC0937	GMFG	NM_004877	-2.26478	23.4514	10.3548
8169186	NM_017752 // TBC1D8B // TBC1 domain family, member 8B (with GRAM domain) // Xq22	TBC1D8B	NM_017752	-2.10164	107.235	51.0245
7929816	NM_005063 // SCD // stearoyl-CoA desaturase (delta-9-desaturase) // 10q23-q24 //	SCD	NM_005063	-2.14982	1362.39	633.724
7959777	NM_080626 // BRI3BP // BRI3 binding protein // 12q24.31 // 140707 /// AF284094 /	BRI3BP	NM_080626	2.00542	41.1846	82.5926
8062041	NM_018677 // ACSS2 // acyl-CoA synthetase short-chain family member 2 // 20q11.2	ACSS2	NM_018677	-3.81975	147.83	38.7015
7942679	NM_018367 // PHCA // phytoceramidase, alkaline // 11q13.5 // 55331 /// BC063034	PHCA	NM_018367	-2.19397	229.283	104.506
7960757	NM_016546 // C1RL // complement component 1, r subcomponent-like // 12p13.31 //	C1RL	NM_016546	-2.14515	46.9053	21.8657
8088915	---		---	2.39821	5.78232	13.8672
8026679	NM_018467 // MDS032 // uncharacterized hematopoietic stem/progenitor cells prote	MDS032	NM_018467	-2.09217	91.6637	43.8128
7996081	NM_201525 // GPR56 // G protein-coupled receptor 56 // 16q12.2-q21 // 9289 /// N	GPR56	NM_201525	-2.52114	306.765	121.677
8004266	NM_201566 // SLC16A13 // solute carrier family 16, member 13 (monocarboxylic aci	SLC16A13	NM_201566	-3.72004	73.8464	19.851
8068083	NM_020152 // C21orf7 // chromosome 21 open reading frame 7 // 21q22.3 // 56911 /	C21orf7	NM_020152	-2.46959	65.0853	26.3548
8066493	NM_003064 // SLPI // secretory leukocyte peptidase inhibitor // 20q12 // 6590	SLPI	NM_003064	-4.0453	57.7557	14.2772
8083839	NM_014373 // GPR160 // G protein-coupled receptor 160 // 3q26.2-q27 // 26996 ///	GPR160	NM_014373	-2.05703	147.673	71.7894
7899615	NM_178865 // SERINC2 // serine incorporator 2 // 1p35.1 // 347735 /// AK127659 /	SERINC2	NM_178865	-2.66503	95.8354	35.9604
8152506	NM_207506 // SAMD12 // sterile alpha motif domain containing 12 // 8q24.12 // 40	SAMD12	NM_207506	-2.4511	43.4003	17.7065
8138888	NM_005020 // PDE1C // phosphodiesterase 1C, calmodulin-dependent 70kDa // 7p15.1	PDE1C	NM_005020	-2.84804	26.2765	9.22615
7970329	NM_000820 // GAS6 // growth arrest-specific 6 // 13q34 // 2621 /// AK126533 // G	GAS6	NM_000820	-2.0103	137.291	68.2939
8020343	NM_032250 // ANKRD20A1 // ankyrin repeat domain 20 family, member A1 // 9q12 //	ANKRD20A1	NM_032250	2.11399	19.6498	41.5394
7951077	NM_144665 // SESN3 // sestrin 3 // 11q21 // 143686 /// BC017296 // SESN3 // sest	SESN3	NM_144665	3.09829	50.7788	157.328
7996264	NM_001795 // CDH5 // cadherin 5, type 2, VE-cadherin (vascular epithelium) // 16	CDH5	NM_001795	-6.66609	635.777	95.3749
7971388	NM_001010875 // SLC25A30 // solute carrier family 25, member 30 // 13q14.12 // 2	SLC25A30	NM_001010875	2.9303	24.3358	71.311
8024572	NM_002068 // GNA15 // guanine nucleotide binding protein (G protein), alpha 15 (	GNA15	NM_002068	-3.21792	73.3643	22.7987
7950864	NM_001014811 // ME3 // malic enzyme 3, NADP(+)-dependent, mitochondrial // 11cen	ME3	NM_001014811	-2.06211	82.9248	40.2137
8121257	NM_182907 // PRDM1 // PR domain containing 1, with ZNF domain // 6q21-q22.1 // 6	PRDM1	NM_182907	-2.71608	31.7745	11.6986
7973530	NM_004563 // PCK2 // phosphoenolpyruvate carboxykinase 2 (mitochondrial) // 14q1	PCK2	NM_004563	-5.22303	159.628	30.5624
8085475	NM_004625 // WNT7A // wingless-type MMTV integration site family, member 7A // 3	WNT7A	NM_004625	-3.06576	31.2408	10.1902
7981982	NR_001290 // SNRPN // small nuclear ribonucleoprotein polypeptide N // 15q11.2 /	SNRPN	NR_001290	-2.47287	38.9462	15.7494
7981986	NR_001290 // SNRPN // small nuclear ribonucleoprotein polypeptide N // 15q11.2 /	SNRPN	NR_001290	-2.47287	38.9462	15.7494
8127854	NM_002395 // ME1 // malic enzyme 1, NADP(+)-dependent, cytosolic // 6q12 // 4199	ME1	NM_002395	-3.324	244.969	73.6969
7913290	AK124869 // SH2D5 // SH2 domain containing 5 // 1p36.12 // 400745 /// XM_375698	SH2D5	AK124869	-2.2068	25.0694	11.3601
8136200	NM_016352 // CPA4 // carboxypeptidase A4 // 7q32 // 51200	CPA4	NM_016352	2.51489	8.93917	22.481
8111772	NM_001343 // DAB2 // disabled homolog 2, mitogen-responsive phosphoprotein (Dros	DAB2	NM_001343	-2.10953	183.357	86.9183
8131292	NM_021163 // RBAK // RB-associated KRAB zinc finger // 7p22.1 // 57786 /// CR620	RBAK	NM_021163	-2.30912	82.4368	35.7005
8165692	---		---	-2.38666	275.774	115.548
8097801	XR_015672 // LOC729830 // similar to CG3558-PA, isoform A // 4q31.3 // 729830 //	LOC729830	XR_015672	-3.33755	42.9336	12.8638
7927082	NM_016371 // HSD17B7 // hydroxysteroid (17-beta) dehydrogenase 7 // 1q23 // 5147	HSD17B7	NM_016371	-2.12579	38.8564	18.2786
7914270	NM_006762 // LAPTM5 // lysosomal associated multispanning membrane protein 5 //	LAPTM5	NM_006762	-8.02187	340.827	42.4873
8097513	NM_002413 // MGST2 // microsomal glutathione S-transferase 2 // 4q28.3 // 4258 /	MGST2	NM_002413	-2.22171	61.0275	27.4687
8034084	NM_005498 // AP1M2 // adaptor-related protein complex 1, mu 2 subunit // 19p13.2	AP1M2	NM_005498	-2.45645	46.2369	18.8226
8089701	NM_015642 // ZBTB20 // zinc finger and BTB domain containing 20 // 3q13.2 // 261	ZBTB20	NM_015642	-2.16369	92.5268	42.7635
7938652	NM_001042536 // INSC // inscuteable homolog (Drosophila) // 11p15.2 // 387755 //	INSC	NM_001042536	-4.25709	61.1554	14.3655
7964460	NM_004083 // DDIT3 // DNA-damage-inducible transcript 3 // 12q13.1-q13.2 // 1649	DDIT3	NM_004083	-2.15933	91.9277	42.5724
7965036	XR_019525 // LOC390345 // hypothetical LOC390345 // 12q21.2 // 390345 /// XR_017	LOC390345	XR_019525	-2.45194	112.097	45.7175
8058765	NM_212475 // FN1 // fibronectin 1 // 2q34 // 2335 /// NM_002026 // FN1 // fibron	FN1	NM_212475	-2.03736	1080.66	530.424
8069582	NM_002772 // PRSS7 // protease, serine, 7 (enterokinase) // 21q21|21q21.1 // 565	PRSS7	NM_002772	5.52362	8.1294	44.9037
8151447	NM_000880 // IL7 // interleukin 7 // 8q12-q13 // 3574 /// AK226000 // IL7 // int	IL7	NM_000880	-2.68588	83.3188	31.021
8022559	NM_173505 // ANKRD29 // ankyrin repeat domain 29 // 18q11.2 // 147463 /// AK1231	ANKRD29	NM_173505	-2.24612	29.3114	13.0498
7950530	---		---	2.31388	10.3127	23.8623
7928046	NM_012339 // TSPAN15 // tetraspanin 15 // 10q21.3 // 23555	TSPAN15	NM_012339	-2.411	82.4569	34.2002
8086125	XM_940627 // LBA1 // lupus brain antigen 1 // 3p22.2 // 9881 /// XM_047357 // LB	LBA1	XM_940627	-2.32461	23.7948	10.236
8104693	NM_178140 // PDZD2 // PDZ domain containing 2 // 5p13.3 // 23037 /// BX648242 //	PDZD2	NM_178140	-2.7485	33.6053	12.2268
7898294	---		---	2.05942	38.5541	79.399
8141872	NM_198990 // NAPE-PLD // N-acyl-phosphatidylethanolamine-hydrolyzing phospholipa	NAPE-PLD	NM_198990	2.11343	18.7124	39.5473
8141950	NM_005045 // RELN // reelin // 7q22 // 5649 /// NM_173054 // RELN // reelin // 7	RELN	NM_005045	-2.38603	25.1073	10.5226
8120613	NM_014989 // RIMS1 // regulating synaptic membrane exocytosis 1 // 6q12-q13 // 2	RIMS1	NM_014989	-2.27544	70.3144	30.9015
8007212	NM_003152 // STAT5A // signal transducer and activator of transcription 5A // 17	STAT5A	NM_003152	-2.80295	34.6412	12.3588
7898413	NM_013358 // PADI1 // peptidyl arginine deiminase, type I // 1p36.13 // 29943	PADI1	NM_013358	-4.76344	41.2138	8.65211
7987145	AL833157 // FMN1 // formin 1 // 15q13.3 // 342184 /// CR749577 // FMN1 // formin	FMN1	AL833157	-2.95396	40.2391	13.6221
7978239	NM_004581 // RABGGTA // Rab geranylgeranyltransferase, alpha subunit // 14q11.2	RABGGTA	NM_004581	-2.04512	33.2414	16.254
8016283	---		---	2.69926	14.686	39.6413
8175039	NM_001421 // ELF4 // E74-like factor 4 (ets domain transcription factor) // Xq26	ELF4	NM_001421	-2.04749	61.8153	30.1908
8068062	NM_001001992 // USP16 // ubiquitin specific peptidase 16 // 21q22.11 // 10600 //	USP16	NM_001001992	2.0149	62.7395	126.414
8022711	NM_024422 // DSC2 // desmocollin 2 // 18q12.1 // 1824 /// NM_004949 // DSC2 // d	DSC2	NM_024422	-2.19223	46.6157	21.264
8123137	NM_004906 // WTAP // Wilms tumor 1 associated protein // 6q25-q27 // 9589 /// NM	WTAP	NM_004906	-2.10447	265.098	125.969
7997491	NM_002153 // HSD17B2 // hydroxysteroid (17-beta) dehydrogenase 2 // 16q24.1-q24.	HSD17B2	NM_002153	-2.21844	20.4848	9.23386
8010967	NM_022463 // NXN // nucleoredoxin // 17p13.3 // 64359 /// BC073845 // NXN // nuc	NXN	NM_022463	3.45575	16.215	56.0349
8042637	NM_003494 // DYSF // dysferlin, limb girdle muscular dystrophy 2B (autosomal rec	DYSF	NM_003494	-3.3082	36.1659	10.9322
8153002	NM_006096 // NDRG1 // N-myc downstream regulated gene 1 // 8q24.3 // 10397 /// B	NDRG1	NM_006096	-2.65911	425.565	160.04
8004416	NM_000747 // CHRNB1 // cholinergic receptor, nicotinic, beta 1 (muscle) // 17p13	CHRNB1	NM_000747	-2.98928	57.25	19.1518
8083240	NM_031850 // AGTR1 // angiotensin II receptor, type 1 // 3q21-q25 // 185 /// NM_	AGTR1	NM_031850	2.05679	20.1363	41.4161
7952453	NM_019055 // ROBO4 // roundabout homolog 4, magic roundabout (Drosophila) // 11q	ROBO4	NM_019055	-2.47204	53.62	21.6906
8010287	NM_198594 // C1QTNF1 // C1q and tumor necrosis factor related protein 1 // 17q25	C1QTNF1	NM_198594	-2.51128	42.7707	17.0315
8133004	---		---	2.07502	8.08892	16.7847
8166469	NM_002970 // SAT1 // spermidine/spermine N1-acetyltransferase 1 // Xp22.1 // 630	SAT1	NM_002970	-2.1211	282.101	132.997
7948249	NM_003627 // SLC43A1 // solute carrier family 43, member 1 // 11p11.2-p11.1 // 8	SLC43A1	NM_003627	-2.39855	61.0832	25.4667
8085628	NM_015199 // ANKRD28 // ankyrin repeat domain 28 // 3p24.3 // 23243 /// AK126888	ANKRD28	NM_015199	-3.27989	393.503	119.975
8089029	NM_176815 // DHFRL1 // dihydrofolate reductase-like 1 // 3q11.2 // 200895 /// AK	DHFRL1	NM_176815	2.38385	31.7569	75.7036
8122013	NM_001007102 // L3MBTL3 // l(3)mbt-like 3 (Drosophila) // 6q23 // 84456 /// NM_0	L3MBTL3	NM_001007102	-3.21649	123.135	38.2823
7995362	NM_133443 // GPT2 // glutamic pyruvate transaminase (alanine aminotransferase) 2	GPT2	NM_133443	-3.42844	286.514	83.5698
7937443	NM_022772 // EPS8L2 // EPS8-like 2 // 11p15.5 // 64787 /// BC080636 // EPS8L2 //	EPS8L2	NM_022772	-2.53837	61.8505	24.3662
7946401	NM_213618 // ST5 // suppression of tumorigenicity 5 // 11p15 // 6764 /// NM_0054	ST5	NM_213618	-2.87293	61.8206	21.5183
8113130	NM_024717 // MCTP1 // multiple C2 domains, transmembrane 1 // 5q15 // 79772 ///	MCTP1	NM_024717	-2.24617	110.758	49.3099
7940135	NM_080661 // GLYATL1 // glycine-N-acyltransferase-like 1 // 11q12.1 // 92292 ///	GLYATL1	NM_080661	-2.84997	36.8257	12.9215
7940869	NM_178443 // URP2 // UNC-112 related protein 2 // 11q13.1 // 83706 /// NM_031471	URP2	NM_178443	-3.69997	53.4303	14.4408
8117458	NM_007048 // BTN3A1 // butyrophilin, subfamily 3, member A1 // 6p22.1 // 11119 /	BTN3A1	NM_007048	-3.74914	94.4562	25.1941
8135378	NM_002736 // PRKAR2B // protein kinase, cAMP-dependent, regulatory, type II, bet	PRKAR2B	NM_002736	2.37918	24.4703	58.2192
8156060	NM_007005 // TLE4 // transducin-like enhancer of split 4 (E(sp1) homolog, Drosop	TLE4	NM_007005	-2.25899	140.723	62.2946
7929911	NM_032429 // LZTS2 // leucine zipper, putative tumor suppressor 2 // 10q24 // 84	LZTS2	NM_032429	-2.21366	70.177	31.7018
8020252	---		---	2.88239	29.5224	85.0951
8085716	NM_002971 // SATB1 // special AT-rich sequence binding protein 1 (binds to nucle	SATB1	NM_002971	-2.50866	164.445	65.5507
8044080	NM_003048 // SLC9A2 // solute carrier family 9 (sodium/hydrogen exchanger), memb	SLC9A2	NM_003048	2.08946	15.0568	31.4605
7994265	---		---	-2.29909	17.6496	7.67679
8053735	---		---	2.35752	101.9	240.233
8040587	BC049384 // KIAA0953 // KIAA0953 // 2p23.3 // 22979 /// AB023170 // KIAA0953 //	KIAA0953	BC049384	4.61073	15.6538	72.1756
7954356	NM_006446 // SLCO1B1 // solute carrier organic anion transporter family, member	SLCO1B1	NM_006446	-2.38651	38.6007	16.1745
8148156	---		---	2.66923	11.5496	30.8285
7923406	NM_002832 // PTPN7 // protein tyrosine phosphatase, non-receptor type 7 // 1q32.	PTPN7	NM_002832	-2.20533	30.8694	13.9977
8037408	NM_002250 // KCNN4 // potassium intermediate/small conductance calcium-activated	KCNN4	NM_002250	-3.13574	100.495	32.0483
7939546	NM_002231 // CD82 // CD82 molecule // 11p11.2 // 3732 /// NM_001024844 // CD82 /	CD82	NM_002231	-2.31504	42.1189	18.1936
8155696	NM_138333 // FAM122A // family with sequence similarity 122A // 9q21.11 // 11622	FAM122A	NM_138333	2.65181	51.1331	135.595
8136983	BC016940 // OR2A20P // olfactory receptor, family 2, subfamily A, member 20 pseu	OR2A20P	BC016940	-2.56222	153.081	59.7453
8082846	NM_004441 // EPHB1 // EPH receptor B1 // 3q21-q23 // 2047 /// AK095305 // EPHB1	EPHB1	NM_004441	-3.41407	380.411	111.425
8067270	NM_153360 // APCDD1L // adenomatosis polyposis coli down-regulated 1-like // 20q	APCDD1L	NM_153360	-2.41755	50.1427	20.7411
8137670	NM_002607 // PDGFA // platelet-derived growth factor alpha polypeptide // 7p22 /	PDGFA	NM_002607	-3.95066	112.994	28.6012
8097692	NM_001957 // EDNRA // endothelin receptor type A // 4q31.23 // 1909 /// S67127 /	EDNRA	NM_001957	-3.66932	140.582	38.3128
8008547	NM_005486 // TOM1L1 // target of myb1-like 1 (chicken) // 17q23.2 // 10040 /// B	TOM1L1	NM_005486	-2.43999	500.456	205.106
8095159	---		---	-2.08307	99.2499	47.646
8099467	NM_005130 // FGFBP1 // fibroblast growth factor binding protein 1 // 4p16-p15 //	FGFBP1	NM_005130	-68.6537	1095.99	15.9641
7974621	NM_023000 // ARID4A // AT rich interactive domain 4A (RBP1-like) // 14q23.1 // 5	ARID4A	NM_023000	-2.40971	74.7467	31.0189
7968789	NM_014059 // RGC32 // response gene to complement 32 // 13q14.11 // 28984	RGC32	NM_014059	-2.14302	116.293	54.2662
8128977	NM_016262 // TUBE1 // tubulin, epsilon 1 // 6q21 // 51175	TUBE1	NM_016262	-2.33311	64.6105	27.6929
8138258	XM_371878 // FLJ14712 // hypothetical protein FLJ14712 // 7p21.3 // 221806 /// X	FLJ14712	XM_371878	-2.61288	39.5139	15.1227
8012054	NM_001365 // DLG4 // discs, large homolog 4 (Drosophila) // 17p13.1 // 1742 ///	DLG4	NM_001365	-2.18977	33.0898	15.1111
8008321	NM_025149 // FLJ20920 // hypothetical protein FLJ20920 // 17q21.33 // 80221	FLJ20920	NM_025149	-2.50462	84.0159	33.5444
8168620	---		---	2.50092	18.2947	45.7535
7954375	---		---	2.15569	22.6653	48.8593
8148476	NM_014957 // DENND3 // DENN/MADD domain containing 3 // 8q24.3 // 22898 /// AK09	DENND3	NM_014957	-3.52462	103.701	29.422
8045283	---		---	2.10779	11.8062	24.885
8067055	NM_006045 // ATP9A // ATPase, Class II, type 9A // 20q13.2 // 10079	ATP9A	NM_006045	-5.11918	109.75	21.4391
7898655	NM_001785 // CDA // cytidine deaminase // 1p36.2-p35 // 978 /// L27943 // CDA //	CDA	NM_001785	-2.79719	137.159	49.0346
7897227	NM_018836 // AJAP1 // adherens junction associated protein 1 // 1p36.32 // 55966	AJAP1	NM_018836	-2.12735	35.043	16.4726
8172110	AL832829 // CXorf38 // chromosome X open reading frame 38 // Xp11.4 // 159013 //	CXorf38	AL832829	-2.00496	71.0263	35.4253
7940996	NM_012094 // PRDX5 // peroxiredoxin 5 // 11q13 // 25824 /// NM_181651 // PRDX5 /	PRDX5	NM_012094	-2.09384	277.622	132.59
8139808	---		---	2.28673	17.5098	40.0401
7976146	---		---	2.09406	9.8077	20.5379
8110327	NM_006480 // RGS14 // regulator of G-protein signalling 14 // 5q35.3 // 10636 //	RGS14	NM_006480	-2.06433	25.4517	12.3293
8072139	---		---	2.39925	7.69335	18.4583
7908777	XM_937850 // LOC285176 // similar to ribosomal protein L10 // 2q35 // 285176	LOC285176	XM_937850	-2.3039	421.709	183.041
8128939	NM_147200 // TRAF3IP2 // TRAF3 interacting protein 2 // 6q21 // 10758 /// NM_147	TRAF3IP2	NM_147200	-2.98987	43.4512	14.5328
7921752	NM_207005 // USF1 // upstream transcription factor 1 // 1q22-q23 // 7391 /// NM_	USF1	NM_207005	-2.62557	81.0921	30.8856
8177222	NM_013230 // CD24 // CD24 molecule // 6q21 // 934	CD24	NM_013230	3.30373	8.45117	27.9204
8002778	NM_152649 // MLKL // mixed lineage kinase domain-like // 16q22.3 // 197259 /// B	MLKL	NM_152649	-2.20361	129.833	58.9186
8043038	---		---	2.4503	26.6242	65.2372
8043498	---		---	2.62275	5.98456	15.696
8093145	XM_001126292 // C3orf34 // chromosome 3 open reading frame 34 // 3q29 // 84984	C3orf34	XM_001126292	2.32161	26.2199	60.8724
7938396	NM_001025390 // AMPD3 // adenosine monophosphate deaminase (isoform E) // 11p15	AMPD3	NM_001025390	-3.31698	41.0928	12.3886
8023575	NM_133459 // CCBE1 // collagen and calcium binding EGF domains 1 // 18q21.32 //	CCBE1	NM_133459	-4.06149	105.216	25.9059
8088550	NM_198859 // PRICKLE2 // prickle homolog 2 (Drosophila) // 3p14.1 // 166336	PRICKLE2	NM_198859	-2.38854	33.8547	14.1738
7916229	NM_018281 // ECHDC2 // enoyl Coenzyme A hydratase domain containing 2 // 1p32.3	ECHDC2	NM_018281	-2.09476	31.4543	15.0157
7937335	NM_003641 // IFITM1 // interferon induced transmembrane protein 1 (9-27) // 11p1	IFITM1	NM_003641	-2.22433	22.8971	10.2939
7981290	NM_004184 // WARS // tryptophanyl-tRNA synthetase // 14q32.31 // 7453 /// NM_173	WARS	NM_004184	-3.86927	592.03	153.008
8102406	---		---	2.0492	7.24542	14.8473
8148446	---		---	2.29069	19.1561	43.8808
7956894	NM_033647 // HELB // helicase (DNA) B // 12q14.3 // 92797 /// BC037946 // HELB /	HELB	NM_033647	-2.1919	35.9231	16.389
7963353	NM_002281 // KRT81 // keratin 81 // 12q13 // 3887 /// BC031978 // KRT81 // kerat	KRT81	NM_002281	-3.10043	117.672	37.9536
8086627	NM_147129 // ALS2CL // ALS2 C-terminal like // 3p21.31 // 259173 /// NM_182775 /	ALS2CL	NM_147129	-2.67445	31.7058	11.855
8143054	NM_001628 // AKR1B1 // aldo-keto reductase family 1, member B1 (aldose reductase	AKR1B1	NM_001628	-3.35337	222.928	66.4788
7950042	NM_133266 // SHANK2 // SH3 and multiple ankyrin repeat domains 2 // 11q13.3 // 2	SHANK2	NM_133266	-2.51062	30.4855	12.1426
8073633	NM_025225 // PNPLA3 // patatin-like phospholipase domain containing 3 // 22q13.3	PNPLA3	NM_025225	-7.2996	134.431	18.4161
7977046	NM_006291 // TNFAIP2 // tumor necrosis factor, alpha-induced protein 2 // 14q32	TNFAIP2	NM_006291	-2.69037	65.9874	24.5273
8082100	NM_017554 // PARP14 // poly (ADP-ribose) polymerase family, member 14 // 3q21.1	PARP14	NM_017554	-2.37017	221.771	93.5677
8044931	---		---	2.46798	10.0906	24.9033
8050007	NM_012293 // PXDN // peroxidasin homolog (Drosophila) // 2p25 // 7837 /// BC0701	PXDN	NM_012293	-2.07914	642.946	309.236
8074063	NM_024866 // ADM2 // adrenomedullin 2 // 22q13.33 // 79924 /// AK090635 // ADM2	ADM2	NM_024866	-2.01283	21.285	10.5747
8174119	NM_032441 // ZMAT1 // zinc finger, matrin type 1 // Xq21 // 84460 /// NM_0010116	ZMAT1	NM_032441	-2.02526	39.4817	19.4946
8001547	NM_015993 // PLLP // plasma membrane proteolipid (plasmolipin) // 16q13 // 51090	PLLP	NM_015993	-2.22305	23.7055	10.6635
8117106	NM_182757 // IBRDC2 // IBR domain containing 2 // 6p22.3 // 255488	IBRDC2	NM_182757	-3.07766	65.0938	21.1504
8135218	NM_005824 // LRRC17 // leucine rich repeat containing 17 // 7q22.1 // 10234 ///	LRRC17	NM_005824	-2.81599	32.026	11.3729
7985016	NM_153271 // SH3PX3 // SH3 and PX domain containing 3 // 15q24.2 // 257364	SH3PX3	NM_153271	-2.7794	77.9052	28.0295
8126820	NM_153840 // GPR110 // G protein-coupled receptor 110 // 6p12.3 // 266977 /// NM	GPR110	NM_153840	-2.59453	27.6836	10.67
8037563	NM_006663 // PPP1R13L // protein phosphatase 1, regulatory (inhibitor) subunit 1	PPP1R13L	NM_006663	-2.03112	39.9216	19.655
8100001	---		---	-2.01315	23.9745	11.909
8122816	---		---	-2.09046	27.1822	13.003
8085914	NM_003615 // SLC4A7 // solute carrier family 4, sodium bicarbonate cotransporter	SLC4A7	NM_003615	-2.42486	346.819	143.026
7896748	---		---	-2.16181	585.578	270.874
8101235	---		---	2.32503	8.78482	20.425
8140650	NM_012431 // SEMA3E // sema domain, immunoglobulin domain (Ig), short basic doma	SEMA3E	NM_012431	-3.28252	77.146	23.5021
8155754	NM_153267 // MAMDC2 // MAM domain containing 2 // 9q21.11 // 256691 /// BX538309	MAMDC2	NM_153267	-2.46551	157.852	64.024
7901192	NM_003579 // RAD54L // RAD54-like (S. cerevisiae) // 1p32 // 8438 /// X97795 //	RAD54L	NM_003579	2.18523	30.1174	65.8135
8161917	---		---	2.06445	23.1419	47.7753
8043480	---		---	2.32499	98.7331	229.554
8119016	NM_002754 // MAPK13 // mitogen-activated protein kinase 13 // 6p21.31 // 5603 //	MAPK13	NM_002754	-4.61295	66.1028	14.3299
7909104	NM_002596 // PCTK3 // PCTAIRE protein kinase 3 // 1q31-q32 // 5129 /// NM_212503	PCTK3	NM_002596	-2.22518	25.421	11.4242
8017843	NM_004694 // SLC16A6 // solute carrier family 16, member 6 (monocarboxylic acid	SLC16A6	NM_004694	-3.96769	72.2734	18.2155
7950162	NM_002599 // PDE2A // phosphodiesterase 2A, cGMP-stimulated // 11q13.4 // 5138 /	PDE2A	NM_002599	-2.19832	107.562	48.9293
8062532	XM_937379 // C20orf95 // chromosome 20 open reading frame 95 // 20q11.23 // 3435	C20orf95	XM_937379	-3.43253	33.7531	9.8333
7927915	NM_152709 // STOX1 // storkhead box 1 // 10q21.3 // 219736 /// AY842017 // STOX1	STOX1	NM_152709	2.56247	9.5278	24.4147
8176865	---		---	-2.09457	48.3297	23.0738
8177460	---		---	-2.09457	48.3297	23.0738
8094301	NM_004787 // SLIT2 // slit homolog 2 (Drosophila) // 4p15.2 // 9353	SLIT2	NM_004787	3.5657	32.2087	114.847
8010918	NM_018289 // VPS53 // vacuolar protein sorting 53 homolog (S. cerevisiae) // 17p	VPS53	NM_018289	-2.08364	130.033	62.4066
8063156	NM_001250 // CD40 // CD40 molecule, TNF receptor superfamily member 5 // 20q12-q	CD40	NM_001250	-2.52734	101.36	40.1054
8015890	NM_004160 // PYY // peptide YY // 17q21.1 // 5697 /// D13902 // PYY // peptide Y	PYY	NM_004160	-5.21491	58.9611	11.3062
8122982	NM_024630 // ZDHHC14 // zinc finger, DHHC-type containing 14 // 6q25.3 // 79683	ZDHHC14	NM_024630	2.00568	14.6056	29.2942
7988438	---		---	2.27921	10.5471	24.039
8064471	BC025286 // SIRPB1 // signal-regulatory protein beta 1 // 20p13 // 10326 /// XR_	SIRPB1	BC025286	-3.81686	37.7521	9.89088
7983926	---		---	2.17692	15.9035	34.6207
8031573	XM_292796 // LOC342931 // similar to ret finger protein-like 1 // 19q13.42 // 34	LOC342931	XM_292796	6.03539	23.9753	144.701
8116910	NM_002114 // HIVEP1 // human immunodeficiency virus type I enhancer binding prot	HIVEP1	NM_002114	-2.30258	87.7609	38.1142
8112731	NM_004101 // F2RL2 // coagulation factor II (thrombin) receptor-like 2 // 5q13 /	F2RL2	NM_004101	-2.08064	20.2019	9.70947
7962137	---		---	2.43206	8.71315	21.1909
8036589	---		---	2.03755	11.8811	24.2083
7927062	NM_006974 // ZNF33A // zinc finger protein 33A // 10p11.2 // 7581 /// NM_006954	ZNF33A	NM_006974	-2.13888	59.7542	27.9371
7960848	---		---	2.13632	7.7751	16.6101
8046861	NM_002210 // ITGAV // integrin, alpha V (vitronectin receptor, alpha polypeptide	ITGAV	NM_002210	-2.31203	539.322	233.268
8086530	NM_015444 // TMEM158 // transmembrane protein 158 // 3p21.3 // 25907	TMEM158	NM_015444	2.01701	56.5152	113.992
8005765	NM_134265 // WSB1 // WD repeat and SOCS box-containing 1 // 17q11.1 // 26118 ///	WSB1	NM_134265	-2.1668	747.952	345.188
7898431	NM_016233 // PADI3 // peptidyl arginine deiminase, type III // 1p36.13 // 51702	PADI3	NM_016233	-2.50216	22.8553	9.13422
8089544	NM_199511 // CCDC80 // coiled-coil domain containing 80 // 3q13.2 // 151887 ///	CCDC80	NM_199511	-4.00278	828.35	206.944
8149927	NM_203339 // CLU // clusterin // 8p21-p12 // 1191 /// NM_001831 // CLU // cluste	CLU	NM_203339	2.82263	8.75505	24.7122
7987439	NM_007223 // GPR176 // G protein-coupled receptor 176 // 15q14-q15.1 // 11245 //	GPR176	NM_007223	-2.27864	211.242	92.7051
7980309	BC002444 // C14orf1 // chromosome 14 open reading frame 1 // 14q24.3 // 11161 //	C14orf1	BC002444	-2.21233	358.328	161.968
8096075	---		---	2.01673	19.1639	38.6485
8155802	NM_004293 // GDA // guanine deaminase // 9q21.13 // 9615 /// BC033310 // GDA //	GDA	NM_004293	-4.164	401.664	96.4612
7923772	NM_001001552 // LEMD1 // LEM domain containing 1 // 1q32.1 // 93273 /// AK026628	LEMD1	NM_001001552	-4.27958	56.5076	13.204
7907572	NM_020318 // PAPPA2 // pappalysin 2 // 1q23-q25 // 60676 /// NM_021936 // PAPPA2	PAPPA2	NM_020318	-6.3172	69.5427	11.0085
8021081	NM_015865 // SLC14A1 // solute carrier family 14 (urea transporter), member 1 (K	SLC14A1	NM_015865	2.91332	128.449	374.215
8168749	NM_014467 // SRPX2 // sushi-repeat-containing protein, X-linked 2 // Xq21.33-q23	SRPX2	NM_014467	-2.00171	125.772	62.8321
8066029	---		---	2.19025	8.27229	18.1183
8023995	NM_005860 // FSTL3 // follistatin-like 3 (secreted glycoprotein) // 19p13 // 102	FSTL3	NM_005860	-2.13487	25.3698	11.8835
8018449	NM_199242 // UNC13D // unc-13 homolog D (C. elegans) // 17q25.1 // 201294 /// AK	UNC13D	NM_199242	-2.46876	39.055	15.8197
8051322	NM_000379 // XDH // xanthine dehydrogenase // 2p23.1 // 7498 /// AK130114 // XDH	XDH	NM_000379	-2.54087	27.3138	10.7498
7983512	NM_021199 // SQRDL // sulfide quinone reductase-like (yeast) // 15q15 // 58472 /	SQRDL	NM_021199	-2.07957	107.141	51.5207
8129271	---		---	2.07214	19.8847	41.2039
8174189	NM_021992 // TMSL8 // thymosin-like 8 // Xq21.33-q22.3 // 11013 /// BC000183 //	TMSL8	NM_021992	2.04531	7.82674	16.0081
8001564	NM_018110 // DOK4 // docking protein 4 // 16q13 // 55715 /// AK001350 // DOK4 //	DOK4	NM_018110	-2.79527	75.1978	26.9018
8176478	---		---	2.04181	9.40837	19.2101
7963588	---		---	2.21949	13.7476	30.5127
8064464	NM_178460 // SIRPD // signal-regulatory protein delta // 20p13 // 128646 /// AK0	SIRPD	NM_178460	-2.89007	33.1937	11.4854
8175193	---		---	2.04029	10.7375	21.9076
7937150	NM_001109 // ADAM8 // ADAM metallopeptidase domain 8 // 10q26.3 // 101	ADAM8	NM_001109	-2.72827	76.6234	28.085
7946334	NM_176821 // NLRP10 // NLR family, pyrin domain containing 10 // 11p15.4 // 3383	NLRP10	NM_176821	-2.37134	37.107	15.6481
8147652	---		---	2.08697	15.9299	33.2453
8034151	NM_020812 // DOCK6 // dedicator of cytokinesis 6 // 19p13.2 // 57572 /// BC01542	DOCK6	NM_020812	-2.35692	31.5345	13.3795
8057898	NM_020760 // HECW2 // HECT, C2 and WW domain containing E3 ubiquitin protein lig	HECW2	NM_020760	-2.24209	24.3824	10.8748
8038960	---		---	2.07561	20.7298	43.0269
7926875	NM_012342 // BAMBI // BMP and activin membrane-bound inhibitor homolog (Xenopus	BAMBI	NM_012342	2.66445	26.6144	70.913
8117476	NM_197974 // BTN3A3 // butyrophilin, subfamily 3, member A3 // 6p21.3 // 10384 /	BTN3A3	NM_197974	-2.56802	48.0526	18.7119
8056113	NM_002349 // LY75 // lymphocyte antigen 75 // 2q24 // 4065 /// NM_014880 // CD30	LY75	NM_002349	-2.78161	185.166	66.5679
8084788	NM_006580 // CLDN16 // claudin 16 // 3q28 // 10686	CLDN16	NM_006580	-2.13568	36.5506	17.1142
8137526	NM_198336 // INSIG1 // insulin induced gene 1 // 7q36 // 3638 /// NM_005542 // I	INSIG1	NM_198336	-3.02257	257.366	85.1478
8124086	---		---	2.23976	13.1203	29.3863
8031570	XM_938138 // LOC649055 // similar to ret finger protein-like 1 // --- // 649055	LOC649055	XM_938138	5.65805	32.8929	186.11
7985213	NM_000745 // CHRNA5 // cholinergic receptor, nicotinic, alpha 5 // 15q24 // 1138	CHRNA5	NM_000745	2.70837	62.7305	169.897
8047763	---		---	-2.126	262.249	123.353
7982018	NR_001291 // HBII-52 // HBII-52 snoRNA // 15q11.2 // 338433	HBII-52	NR_001291	2.07545	8.06568	16.7399
8140443	XR_017749 // FDPSL2A // MGC44478 // 7q11.23 // 619190 /// XR_017751 // LOC441261	FDPSL2A	XR_017749	-2.23452	85.7584	38.3788
7940561	NM_004111 // FEN1 // flap structure-specific endonuclease 1 // 11q12 // 2237 ///	FEN1	NM_004111	2.07176	87.9348	182.18
8115851	NM_003714 // STC2 // stanniocalcin 2 // 5q35.2 // 8614 /// AK095862 // STC2 // s	STC2	NM_003714	-4.60642	89.8723	19.5102
8143629	BC016940 // OR2A20P // olfactory receptor, family 2, subfamily A, member 20 pseu	OR2A20P	BC016940	-2.31306	94.2897	40.7641
8116548	NM_020185 // DUSP22 // dual specificity phosphatase 22 // 6p25.3 // 56940 /// BC	DUSP22	NM_020185	-2.03298	31.5084	15.4986
8160767	---		---	2.06799	10.1703	21.0321
8076415	X58061 // RNU13P1 // RNA, U13 small nuclear pseudogene 1 // --- // 6076	RNU13P1	X58061	2.22722	5.72371	12.748
7899988	---		---	2.12721	13.1273	27.9245
8043375	---		---	-2.15316	482.054	223.882
7896752	---		---	-2.13226	371.628	174.288
7985482	XM_058720 // WHDC1 // WAS protein homology region 2 domain containing 1 // 15q25	WHDC1	XM_058720	-2.10724	45.1789	21.4398
8165667	---		---	-2.13226	371.628	174.288
8080578	NM_018398 // CACNA2D3 // calcium channel, voltage-dependent, alpha 2/delta 3 sub	CACNA2D3	NM_018398	-2.52153	36.2292	14.368
8016371	NM_138355 // SCRN2 // secernin 2 // 17q21.32 // 90507 /// CR596796 // SCRN2 // s	SCRN2	NM_138355	-2.12564	39.173	18.4288
8060418	NM_001040022 // SIRPA // signal-regulatory protein alpha // 20p13 // 140885 ///	SIRPA	NM_001040022	-2.48708	49.1575	19.7652
7945663	AK022293 // CTSD // cathepsin D // 11p15.5 // 1509 /// BC036199 // LOC402778 //	CTSD	AK022293	-2.07629	21.2252	10.2227
7958565	NM_000431 // MVK // mevalonate kinase (mevalonic aciduria) // 12q24 // 4598 ///	MVK	NM_000431	-2.33273	74.8402	32.0827
7903786	NM_000757 // CSF1 // colony stimulating factor 1 (macrophage) // 1p21-p13 // 143	CSF1	NM_000757	-3.20805	119.264	37.1766
7964360	NM_003153 // STAT6 // signal transducer and activator of transcription 6, interl	STAT6	NM_003153	-2.06033	162.435	78.8392
7910692	---		---	2.01414	8.33338	16.7846
7927186	NM_032023 // RASSF4 // Ras association (RalGDS/AF-6) domain family 4 // 10q11.21	RASSF4	NM_032023	-2.43268	28.0221	11.519
8040068	---		---	2.00851	9.18732	18.4529
8007363	NM_032387 // WNK4 // WNK lysine deficient protein kinase 4 // 17q21-q22 // 65266	WNK4	NM_032387	-2.01535	30.3816	15.0751
8030721	NM_002975 // CLEC11A // C-type lectin domain family 11, member A // 19q13.3 // 6	CLEC11A	NM_002975	-2.09883	158.675	75.6019
7982090	---		---	2.06974	7.89598	16.3427
7897774	NM_001286 // CLCN6 // chloride channel 6 // 1p36 // 1185 /// NM_021736 // CLCN6	CLCN6	NM_001286	-2.56369	164.722	64.2518
7953626	NM_014718 // CLSTN3 // calsyntenin 3 // 12p13.31 // 9746 /// BC039075 // CLSTN3	CLSTN3	NM_014718	-2.40175	48.7344	20.2912
8123246	NM_021977 // SLC22A3 // solute carrier family 22 (extraneuronal monoamine transp	SLC22A3	NM_021977	-2.11759	33.2147	15.6851
7995681	NM_004530 // MMP2 // matrix metallopeptidase 2 (gelatinase A, 72kDa gelatinase,	MMP2	NM_004530	-6.90262	83.2618	12.0623
8088180	NM_003392 // WNT5A // wingless-type MMTV integration site family, member 5A // 3	WNT5A	NM_003392	-2.07975	39.2187	18.8574
7983924	---		---	2.20478	28.62	63.1007
8163616	---		---	2.18048	7.68529	16.7577
8055948	---		---	2.10908	8.96157	18.9007
8139784	---		---	2.09497	8.87576	18.5944
8172876	NM_006306 // SMC1A // structural maintenance of chromosomes 1A // Xp11.22-p11.21	SMC1A	NM_006306	2.06988	114.713	237.442
8112342	NM_197941 // ADAMTS6 // ADAM metallopeptidase with thrombospondin type 1 motif,	ADAMTS6	NM_197941	-3.13635	142.777	45.5231
7964872	NM_002837 // PTPRB // protein tyrosine phosphatase, receptor type, B // 12q15-q2	PTPRB	NM_002837	-5.91281	46.4213	7.85098
7928328	---		---	2.00853	29.8088	59.8719
8068494	---		---	-2.44231	42.4785	17.3928
8010139	NM_001039573 // SEC14L1 // SEC14-like 1 (S. cerevisiae) // 17q25.1-17q25.2 // 63	SEC14L1	NM_001039573	-2.04747	406.276	198.429
7953622	AK091792 // UNQ2963 // hypothetical protein LOC283314 // 12p13.31 // 283314 ///	UNQ2963	AK091792	-2.83205	29.6986	10.4866
7929956	---		---	2.11043	10.537	22.2376
8037594	NM_005619 // RTN2 // reticulon 2 // 19q13.32 // 6253 /// NM_206902 // RTN2 // re	RTN2	NM_005619	-2.00407	34.2766	17.1035
8113790	NM_178450 // MARCH3 // membrane-associated ring finger (C3HC4) 3 // 5q23.2 // 11	2011-03-03	NM_178450	2.68595	32.489	87.2637
7939559	NM_130783 // TSPAN18 // tetraspanin 18 // 11p11.2 // 90139 /// NM_001031730 // T	TSPAN18	NM_130783	-3.12664	34.7876	11.1262
7971901	---		---	2.24931	10.9431	24.6146
8132988	---		---	2.05904	31.2391	64.3228
7938128	BX647806 // CCDC35 // coiled-coil domain containing 35 // 11p15.4 // 387750 ///	CCDC35	BX647806	-3.7715	119.139	31.5893
7948320	---		---	2.38549	10.8761	25.9448
8132513	AF221846 // STK17A // serine/threonine kinase 17a (apoptosis-inducing) // 7p12-p	STK17A	AF221846	2.10841	18.8154	39.6707
8140420	XR_017751 // LOC441261 // farnesyl pyrophosphate synthetase like // 7q11.23 // 4	LOC441261	XR_017751	-2.14394	68.8326	32.1056
8007550	NM_153006 // NAGS // N-acetylglutamate synthase // 17q21.31 // 162417 /// AK0919	NAGS	NM_153006	-2.28789	55.9264	24.4446
7938118	NM_012192 // FXC1 // fracture callus 1 homolog (rat) // 11p15.5-p15.3 // 26515 /	FXC1	NM_012192	-2.37079	63.4534	26.7647
8081333	---		---	2.01144	13.5709	27.2971
8114991	NM_024577 // SH3TC2 // SH3 domain and tetratricopeptide repeats 2 // 5q32 // 796	SH3TC2	NM_024577	-2.46954	51.1439	20.7099
7979455	NM_021136 // RTN1 // reticulon 1 // 14q23.1 // 6252 /// NM_206852 // RTN1 // ret	RTN1	NM_021136	2.43262	14.2919	34.7667
7898353	XM_001130712 // LOC729587 // hypothetical protein LOC729587 // 1p36.13 // 729587	LOC729587	XM_001130712	-2.08137	14.579	7.00454
7942417	NM_014786 // ARHGEF17 // Rho guanine nucleotide exchange factor (GEF) 17 // 11q1	ARHGEF17	NM_014786	-2.02522	34.7967	17.1817
8128954	---		---	2.55994	12.8024	32.7735
7934979	NM_014391 // ANKRD1 // ankyrin repeat domain 1 (cardiac muscle) // 10q23.31 // 2	ANKRD1	NM_014391	-2.7062	48.2361	17.8243
7961757	NM_003034 // ST8SIA1 // ST8 alpha-N-acetyl-neuraminide alpha-2,8-sialyltransfera	ST8SIA1	NM_003034	-2.08171	27.619	13.2674
7965941	NM_031302 // GLT8D2 // glycosyltransferase 8 domain containing 2 // 12q // 83468	GLT8D2	NM_031302	-2.25357	58.4083	25.9181
8066027	---		---	2.30234	9.15803	21.0849
7993800	NM_020424 // LYRM1 // LYR motif containing 1 // 16p11.2 // 57149 /// CR620481 //	LYRM1	NM_020424	-2.15499	40.9823	19.0174
7921144	NM_003975 // SH2D2A // SH2 domain protein 2A // 1q21 // 9047 /// AY763098 // SH2	SH2D2A	NM_003975	-2.53219	29.0358	11.4667
8002247	---		---	2.03431	8.71033	17.7195
8049487	NM_024101 // MLPH // melanophilin // 2q37.3 // 79083 /// NM_001042467 // MLPH //	MLPH	NM_024101	-3.09612	81.4249	26.299
8083144	---		---	2.18764	8.05942	17.6311
8035901	---		---	2.02414	23.1356	46.8296
8019316	NM_153824 // PYCR1 // pyrroline-5-carboxylate reductase 1 // 17q25.3 // 5831 ///	PYCR1	NM_153824	-3.01239	71.8101	23.8382
7938213	NM_175733 // SYT9 // synaptotagmin IX // 11p15.4 // 143425 /// BC029605 // SYT9	SYT9	NM_175733	-2.59211	21.4212	8.26401
8055198	---		---	2.6041	11.6999	30.4676
7952341	NM_024769 // ASAM // adipocyte-specific adhesion molecule // 11q24.1 // 79827	ASAM	NM_024769	-2.89997	217.172	74.8877
8133010	---		---	2.30263	15.8262	36.4419
8120333	---		---	2.10567	13.5689	28.5715
8075483	NM_052880 // MGC17330 // HGFL gene // 22q12.2 // 113791 /// AF528079 // MGC17330	MGC17330	NM_052880	-4.58901	53.4473	11.6468
8081951	---		---	2.18904	8.10341	17.7387
8130641	XR_017956 // C6orf59 // chromosome 6 open reading frame 59 // 6q26 // 79992 ///	C6orf59	XR_017956	-2.76678	47.6153	17.2097
8065353	NM_000361 // THBD // thrombomodulin // 20p12-cen // 7056	THBD	NM_000361	-2.71638	198.025	72.9001
8116295	---		---	2.08559	28.1676	58.7461
8061746	NM_006892 // DNMT3B // DNA (cytosine-5-)-methyltransferase 3 beta // 20q11.2 //	DNMT3B	NM_006892	-2.34447	40.5743	17.3064
8152512	NM_002546 // TNFRSF11B // tumor necrosis factor receptor superfamily, member 11b	TNFRSF11B	NM_002546	-2.7213	53.8013	19.7704
7921713	NM_144504 // F11R // F11 receptor // 1q21.2-q21.3 // 50848 /// NM_016946 // F11R	F11R	NM_144504	-2.76839	106.356	38.4178
7966026	NM_014840 // NUAK1 // NUAK family, SNF1-like kinase, 1 // 12q23.3 // 9891 /// XM	NUAK1	NM_014840	-2.65814	64.0036	24.0783
8052733	NM_000945 // PPP3R1 // protein phosphatase 3 (formerly 2B), regulatory subunit B	PPP3R1	NM_000945	2.51792	13.5991	34.2414
8082240	---		---	2.79712	16.8068	47.0105
8103025	NM_178835 // LOC152485 // hypothetical protein LOC152485 // 4q31.22 // 152485 //	LOC152485	NM_178835	-3.05104	63.2438	20.7286
8139500	NM_022748 // TNS3 // tensin 3 // 7p12.3 // 64759 /// BC071791 // TNS3 // tensin	TNS3	NM_022748	-3.09658	182.882	59.0594
7995793	NR_001447 // MT1L // metallothionein 1L (pseudogene) // 16q13 // 4500 /// BC0703	MT1L	NR_001447	-3.57408	489.69	137.011
7951133	NM_032427 // MAML2 // mastermind-like 2 (Drosophila) // 11q21 // 84441 /// CR627	MAML2	NM_032427	-3.10371	57.8306	18.6327
8158928	---		---	2.00268	12.4367	24.9066
7990806	---		---	2.62933	10.4642	27.5137
7982008	NR_001291 // HBII-52 // HBII-52 snoRNA // 15q11.2 // 338433	HBII-52	NR_001291	2.04052	8.77958	17.9149
7982032	NR_001291 // HBII-52 // HBII-52 snoRNA // 15q11.2 // 338433 /// XM_943073 // LOC	HBII-52	NR_001291	2.04052	8.77958	17.9149
7982038	NR_001291 // HBII-52 // HBII-52 snoRNA // 15q11.2 // 338433	HBII-52	NR_001291	2.04052	8.77958	17.9149
7935337	NM_152309 // PIK3AP1 // phosphoinositide-3-kinase adaptor protein 1 // 10q24.1 /	PIK3AP1	NM_152309	-2.28797	37.701	16.4779
8150163	---		---	2.02481	10.5072	21.2751
8139782	---		---	2.16125	9.21903	19.9246
8043026	---		---	2.23974	13.1293	29.4064
7934991	---		---	2.05673	12.6222	25.9604
7957338	NM_005639 // SYT1 // synaptotagmin I // 12cen-q21 // 6857 /// AK094616 // SYT1 /	SYT1	NM_005639	-2.93128	93.6703	31.9554
7934568	---		---	2.00782	17.7249	35.5884
7925248	---		---	2.1762	21.1328	45.9892
8015210	XM_001127069 // KRTAP2-2 // keratin associated protein 2-2 // 17q12-q21 // 85296	KRTAP2-2	XM_001127069	2.62629	45.2997	118.97
8019576	XM_001127070 // LOC728285 // similar to keratin associated protein 2-4 // 17q21.	LOC728285	XM_001127070	2.62629	45.2997	118.97
7982012	---		---	2.2695	11.6376	26.4115
8045806	---		---	2.19853	18.9479	41.6573
7969493	NM_144777 // SCEL // sciellin // 13q22 // 8796 /// NM_003843 // SCEL // sciellin	SCEL	NM_144777	-2.21463	22.7084	10.2538
8113303	---		---	2.12715	23.2529	49.4626
8096959	NM_001148 // ANK2 // ankyrin 2, neuronal // 4q25-q27 // 287 /// NM_020977 // ANK	ANK2	NM_001148	-2.20989	64.339	29.1141
7993713	NM_153208 // IQCK // IQ motif containing K // 16p12.3 // 124152 /// BC034823 //	IQCK	NM_153208	-2.02004	40.7105	20.1533
7952577	NM_032531 // KIRREL3 // kin of IRRE like 3 (Drosophila) // 11q24 // 84623 /// AY	KIRREL3	NM_032531	2.05556	21.4087	44.0067
7960771	NM_174941 // CD163L1 // CD163 molecule-like 1 // 12p13.3 // 283316	CD163L1	NM_174941	-2.62071	64.9498	24.7833
8179731	NM_002117 // HLA-C // major histocompatibility complex, class I, C // 6p21.3 //	HLA-C	NM_002117	-2.05347	890.502	433.657
8139207	NM_002192 // INHBA // inhibin, beta A (activin A, activin AB alpha polypeptide)	INHBA	NM_002192	-4.10135	104.875	25.5709
8105411	NM_139017 // IL31RA // interleukin 31 receptor A // 5q11.2 // 133396 /// AY49934	IL31RA	NM_139017	-2.27994	185.725	81.4603
8008627	NM_005450 // NOG // noggin // 17q21-q22 // 9241	NOG	NM_005450	-3.48881	117.583	33.7027
7900876	---		---	2.12072	13.6812	29.014
8162927	---		---	2.20813	21.6467	47.7986
7962181	---		---	2.00724	9.89736	19.8664
7915147	NM_004468 // FHL3 // four and a half LIM domains 3 // 1p34 // 2275	FHL3	NM_004468	-2.47277	36.807	14.8849
8072710	NM_030641 // APOL6 // apolipoprotein L, 6 // 22q12.3 // 80830	APOL6	NM_030641	-2.96162	91.12	30.7669
8108217	NM_000358 // TGFBI // transforming growth factor, beta-induced, 68kDa // 5q31 //	TGFBI	NM_000358	-3.19059	247.414	77.5449
8074204	NM_175878 // XKR3 // XK, Kell blood group complex subunit-related family, member	XKR3	NM_175878	-2.16972	26.8349	12.3679
8156356	---		---	2.32933	12.0021	27.9568
7933105	NM_145011 // ZNF25 // zinc finger protein 25 // 10p11.21 // 219749 /// BC036038	ZNF25	NM_145011	-2.50469	38.2369	15.2661
8100734	NM_001077 // UGT2B17 // UDP glucuronosyltransferase 2 family, polypeptide B17 //	UGT2B17	NM_001077	2.00494	11.0965	22.2477
8151583	---		---	2.21296	9.53453	21.0995
8175297	---		---	2.11217	10.22	21.5864
8100549	---		---	2.25388	16.9718	38.2523
8166609	---		---	2.21065	15.9618	35.2859
7916341	---		---	2.08025	10.9595	22.7984
7957688	NM_198520 // C12orf63 // chromosome 12 open reading frame 63 // 12q23.1 // 37446	C12orf63	NM_198520	-2.61676	149.532	57.1439
7901334	---		---	2.17666	15.3113	33.3273
8056151	NM_007366 // PLA2R1 // phospholipase A2 receptor 1, 180kDa // 2q23-q24 // 22925	PLA2R1	NM_007366	-2.47034	27.8929	11.2911
8054712	NM_000575 // IL1A // interleukin 1, alpha // 2q14 // 3552 /// NM_152515 // CKAP2	IL1A	NM_000575	-2.80156	366.488	130.816
7933204	NM_007021 // C10orf10 // chromosome 10 open reading frame 10 // 10q11.21 // 1106	C10orf10	NM_007021	-4.77772	127.084	26.5993
7949672	---		---	2.07227	7.89651	16.3637
8007757	NM_005892 // FMNL1 // formin-like 1 // 17q21 // 752 /// AK131091 // FMNL1 // for	FMNL1	NM_005892	-3.05008	73.3444	24.0468
8132990	---		---	2.15284	19.5688	42.1284
8112196	---		---	2.13982	12.87	27.5394
8014794	NM_000723 // CACNB1 // calcium channel, voltage-dependent, beta 1 subunit // 17q	CACNB1	NM_000723	-2.079	35.0872	16.877
7989216	---		---	2.00045	12.8684	25.7425
8097951	---		---	2.7299	20.4146	55.7299
8088842	---		---	2.51056	9.26591	23.2627
7972713	NM_004093 // EFNB2 // ephrin-B2 // 13q33 // 1948	EFNB2	NM_004093	2.60589	27.3448	71.2577
8153035	---		---	2.27938	18.2404	41.5768
8066786	NM_183047 // PRKCBP1 // protein kinase C binding protein 1 // 20q13.12 // 23613	PRKCBP1	NM_183047	-3.716	336.1	90.4467
7942409	NM_176796 // P2RY6 // pyrimidinergic receptor P2Y, G-protein coupled, 6 // 11q13	P2RY6	NM_176796	-2.16456	21.96	10.1452
7968344	NM_001629 // ALOX5AP // arachidonate 5-lipoxygenase-activating protein // 13q12	ALOX5AP	NM_001629	-9.5951	83.7313	8.72647
7995492	NM_001114 // ADCY7 // adenylate cyclase 7 // 16q12-q13 // 113 /// BC039891 // AD	ADCY7	NM_001114	-2.13186	83.7167	39.2694
7938608	NM_006108 // SPON1 // spondin 1, extracellular matrix protein // 11p15.2 // 1041	SPON1	NM_006108	5.35371	10.6871	57.2158
8021091	NM_213602 // CD33L3 // CD33 molecule-like 3 // 18q12.3 // 284266 /// AK095432 //	CD33L3	NM_213602	-2.31367	172.925	74.7407
8055267	---		---	2.17171	14.5818	31.6674
8175393	NM_004840 // ARHGEF6 // Rac/Cdc42 guanine nucleotide exchange factor (GEF) 6 //	ARHGEF6	NM_004840	-2.10581	22.7441	10.8006
8119898	NM_001025366 // VEGFA // vascular endothelial growth factor A // 6p12 // 7422 //	VEGFA	NM_001025366	-2.97002	120.313	40.5092
7987308	---		---	2.13497	10.5835	22.5953
8017850	NM_017983 // WIPI1 // WD repeat domain, phosphoinositide interacting 1 // 17q24.	WIPI1	NM_017983	-2.39082	144.45	60.4189
8007493	NM_001661 // ARL4D // ADP-ribosylation factor-like 4D // 17q12-q21 // 379	ARL4D	NM_001661	2.23673	38.6922	86.5441
8120043	NM_001015051 // RUNX2 // runt-related transcription factor 2 // 6p21 // 860 ///	RUNX2	NM_001015051	-3.27463	43.0906	13.1589
8106919	---		---	2.06418	9.22009	19.0319
7940147	BC062456 // FAM111B // family with sequence similarity 111, member B // 11q12.1	FAM111B	BC062456	2.86934	82.4644	236.618
7914878	---		---	2.944	123.75	364.321
7987648	---		---	2.56515	17.6761	45.3419
8034837	NM_006145 // DNAJB1 // DnaJ (Hsp40) homolog, subfamily B, member 1 // 19p13.2 //	DNAJB1	NM_006145	2.19666	172.276	378.433
8116818	NM_001718 // BMP6 // bone morphogenetic protein 6 // 6p24-p23 // 654	BMP6	NM_001718	2.71798	18.7252	50.8946
8000001	---		---	2.2899	6.97401	15.9698
8115490	NM_023038 // ADAM19 // ADAM metallopeptidase domain 19 (meltrin beta) // 5q32-q3	ADAM19	NM_023038	-3.22205	119.904	37.2135
8160084	---		---	2.11703	11.7509	24.8769
8168855	BC036206 // ARMCX4 // armadillo repeat containing, X-linked 4 // Xq22.1 // 15894	ARMCX4	BC036206	-2.51092	29.1763	11.6198
7961371	NM_030640 // DUSP16 // dual specificity phosphatase 16 // 12p13 // 80824 /// AB0	DUSP16	NM_030640	-2.32395	54.3269	23.3769
8107044	NM_022350 // LRAP // leukocyte-derived arginine aminopeptidase // 5q15 // 64167	LRAP	NM_022350	-2.36474	292.472	123.68
7997942	NM_153636 // CPNE7 // copine VII // 16q24.3 // 27132 /// NM_014427 // CPNE7 // c	CPNE7	NM_153636	-2.55114	48.4605	18.9956
8090098	NM_053025 // MYLK // myosin, light chain kinase // 3q21 // 4638 /// NM_053027 //	MYLK	NM_053025	-3.31703	156.976	47.3243
8008289	AY358204 // TMEM92 // transmembrane protein 92 // 17q21.33 // 162461 /// NM_1532	TMEM92	AY358204	-3.56259	74.3203	20.8613
8137874	NM_032415 // CARD11 // caspase recruitment domain family, member 11 // 7p22 // 8	CARD11	NM_032415	-3.08059	27.9791	9.08239
7917794	---		---	2.40875	15.0174	36.1733
7907657	NM_152663 // RALGPS2 // Ral GEF with PH domain and SH3 binding motif 2 // 1q25.2	RALGPS2	NM_152663	-2.28939	610.463	266.649
8054722	NM_000576 // IL1B // interleukin 1, beta // 2q14 // 3553	IL1B	NM_000576	-3.07932	630.986	204.911
7905986	NM_002004 // FDPS // farnesyl diphosphate synthase (farnesyl pyrophosphate synth	FDPS	NM_002004	-2.79817	394.229	140.888
8047300	NM_001159 // AOX1 // aldehyde oxidase 1 // 2q33 // 316 /// NR_001557 // AOX2 //	AOX1	NM_001159	-2.84092	192.382	67.7182
8032789	NM_017720 // STAP2 // signal-transducing adaptor protein-2 // 19p13.3 // 55620 /	STAP2	NM_017720	-3.77192	86.3101	22.8823
7973838	---		---	2.22091	13.6198	30.2484
8055602	---		---	2.10759	24.0068	50.5965
8071202	---		---	2.19478	9.46032	20.7633
8053551	NM_022912 // REEP1 // receptor accessory protein 1 // 2p11.2 // 65055 /// NM_006	REEP1	NM_022912	2.50656	8.28375	20.7637
7901175	NM_005727 // TSPAN1 // tetraspanin 1 // 1p34.1 // 10103	TSPAN1	NM_005727	-4.79788	184.31	38.4149
7955462	---		---	2.47031	10.417	25.7332
8099850	BC030803 // TMEM156 // transmembrane protein 156 // 4p14 // 80008 /// NM_024943	TMEM156	BC030803	-2.94051	196.405	66.7929
8028570	NM_001004318 // FLJ16165 // purple acid phosphatase long form // 19q13.2 // 3909	FLJ16165	NM_001004318	-3.14054	28.3798	9.03661
7966568	---		---	2.0672	10.0179	20.709
8146669	NM_033058 // TRIM55 // tripartite motif-containing 55 // 8q13.1 // 84675 /// NM_	TRIM55	NM_033058	-3.6697	74.502	20.3019
8091861	---		---	2.15426	11.9054	25.6472
8113039	NM_002397 // MEF2C // MADS box transcription enhancer factor 2, polypeptide C (m	MEF2C	NM_002397	-3.30395	72.4794	21.9372
8061127	---		---	3.04946	13.1995	40.2513
7905938	NM_018845 // RAG1AP1 // recombination activating gene 1 activating protein 1 //	RAG1AP1	NM_018845	-2.44205	342.93	140.427
8043197	NM_003761 // VAMP8 // vesicle-associated membrane protein 8 (endobrevin) // 2p12	VAMP8	NM_003761	-2.29604	129.75	56.5102
7957958	---		---	2.39323	14.9249	35.7187
8131844	NM_001005340 // GPNMB // glycoprotein (transmembrane) nmb // 7p15 // 10457 /// N	GPNMB	NM_001005340	-2.37593	134.708	56.697
8100003	---		---	-2.7423	68.1304	24.8443
8000574	NM_001042483 // NUPR1 // nuclear protein 1 // 16p11.2 // 26471 /// NM_012385 //	NUPR1	NM_001042483	-2.93501	34.4387	11.7338
8055087	---		---	2.36343	12.4734	29.48
7913593	NM_003196 // TCEA3 // transcription elongation factor A (SII), 3 // 1p36.12 // 6	TCEA3	NM_003196	-2.84889	36.9801	12.9805
8019545	NM_001009905 // B3GNTL1 // UDP-GlcNAc:betaGal beta-1,3-N-acetylglucosaminyltrans	B3GNTL1	NM_001009905	-3.26111	72.5894	22.2591
7923453	NM_006618 // JARID1B // jumonji, AT rich interactive domain 1B // 1q32.1 // 1076	JARID1B	NM_006618	-2.86516	201.092	70.1851
7966213	NM_052845 // MMAB // methylmalonic aciduria (cobalamin deficiency) cblB type //	MMAB	NM_052845	-2.02735	46.2537	22.8148
8168553	---		---	2.07909	12.4792	25.9454
8020664	---		---	2.07722	18.8815	39.2209
8145774	---		---	2.10713	23.7861	50.1203
8015914	NM_005474 // HDAC5 // histone deacetylase 5 // 17q21 // 10014 /// NM_001015053 /	HDAC5	NM_005474	-2.53935	56.6603	22.313
7965916	---		---	2.12808	8.96906	19.0869
8034565	NM_001375 // DNASE2 // deoxyribonuclease II, lysosomal // 19p13.2 // 1777 /// BC	DNASE2	NM_001375	-2.19477	65.4304	29.812
8175177	NM_133486 // MBNL3 // muscleblind-like 3 (Drosophila) // Xq26.2 // 55796 /// NM_	MBNL3	NM_133486	-3.31659	54.6229	16.4696
8170538	NM_018558 // GABRQ // gamma-aminobutyric acid (GABA) receptor, theta // Xq28 //	GABRQ	NM_018558	2.99893	21.3239	63.9491
8082066	NM_014367 // C3orf28 // chromosome 3 open reading frame 28 // 3q21.1 // 26355 //	C3orf28	NM_014367	-2.18261	73.8162	33.8202
7936282	---		---	2.59176	10.3776	26.8963
7952315	---		---	-3.00951	117.786	39.138
7960817	---		---	2.20592	20.7171	45.7001
8096536	---		---	2.45107	5.90169	14.4654
7949482	NM_032193 // RNASEH2C // ribonuclease H2, subunit C // 11q13.1 // 84153 /// BC02	RNASEH2C	NM_032193	2.01219	48.2873	97.1633
7951343	---		---	2.21167	21.3111	47.1332
8018078	---		---	2.6002	17.9683	46.7211
7955613	NM_005556 // KRT7 // keratin 7 // 12q12-q13 // 3855 /// BC107082 // KRT7 // kera	KRT7	NM_005556	-3.83066	545.548	142.416
7928060	---		---	2.35978	10.0272	23.662
8146157	---		---	2.26501	16.0233	36.2928
8132209	---		---	-2.10891	30.9993	14.6992
8082572	---		---	2.07192	7.51623	15.573
7924497	---		---	2.05474	9.82938	20.1968
7943998	NM_006169 // NNMT // nicotinamide N-methyltransferase // 11q23.1 // 4837 /// BC0	NNMT	NM_006169	-2.53917	92.6038	36.4701
8171201	---		---	2.3309	13.4405	31.3285
8100576	---		---	2.16316	7.85581	16.9934
8019778	NM_002861 // PCYT2 // phosphate cytidylyltransferase 2, ethanolamine // 17q25.3	PCYT2	NM_002861	-2.16121	73.1088	33.8277
7919326	NM_016361 // ACP6 // acid phosphatase 6, lysophosphatidic // 1q21 // 51205 /// A	ACP6	NM_016361	-2.18696	118.032	53.9706
8069301	NM_001849 // COL6A2 // collagen, type VI, alpha 2 // 21q22.3 // 1292 /// NM_0581	COL6A2	NM_001849	-2.11361	57.4882	27.199
8139818	---		---	2.40567	12.8437	30.8976
7949019	---		---	2.43751	22.0098	53.6491
8174311	---		---	2.31291	8.8588	20.4896
8023187	---		---	2.28538	9.51482	21.745
8089259	---		---	-2.16659	74.707	34.4813
8081943	---		---	2.17156	11.4359	24.8338
8124158	---		---	2.16158	9.78409	21.1491
8019280	NM_002861 // PCYT2 // phosphate cytidylyltransferase 2, ethanolamine // 17q25.3	PCYT2	NM_002861	-2.00644	76.7839	38.2688
8020357	NM_001029862 // ANKRD30B // ankyrin repeat domain 30B // 18p11.21 // 374860 ///	ANKRD30B	NM_001029862	2.03661	5.83683	11.8873
7968800	NM_178009 // DGKH // diacylglycerol kinase, eta // 13q14.11 // 160851 /// NM_152	DGKH	NM_178009	-3.07121	278.784	90.7735
8031680	---		---	2.00307	12.7069	25.4527
8023497	NM_005603 // ATP8B1 // ATPase, Class I, type 8B, member 1 // 18q21-q22|18q21.31	ATP8B1	NM_005603	-3.29898	256.478	77.7446
8174361	NM_198057 // TSC22D3 // TSC22 domain family, member 3 // Xq22.3 // 1831 /// NM_0	TSC22D3	NM_198057	-4.61501	78.213	16.9476
7954490	---		---	2.30513	12.8894	29.7118
8161884	NM_138818 // PRUNE2 // prune homolog 2 (Drosophila) // 9q21.13 // 158471	PRUNE2	NM_138818	2.80924	9.46834	26.5989
8073015	NM_006855 // KDELR3 // KDEL (Lys-Asp-Glu-Leu) endoplasmic reticulum protein rete	KDELR3	NM_006855	-2.25869	137.325	60.7983
7952490	NM_005103 // FEZ1 // fasciculation and elongation protein zeta 1 (zygin I) // 11	FEZ1	NM_005103	2.54139	9.3975	23.8828
7967544	NM_005505 // SCARB1 // scavenger receptor class B, member 1 // 12q24.31 // 949 /	SCARB1	NM_005505	-2.45525	61.3552	24.9894
8103370	---		---	2.05772	30.5603	62.8847
8000369	---		---	2.19041	11.0085	24.1132
7999909	NM_016235 // GPRC5B // G protein-coupled receptor, family C, group 5, member B /	GPRC5B	NM_016235	-3.1118	52.3236	16.8146
8047555	---		---	2.23084	12.8729	28.7173
8083673	NM_001042706 // IQCJ // IQ motif containing J // 3q25.32 // 654502 /// NM_001042	IQCJ	NM_001042706	-2.39573	115.365	48.1544
7950671	NM_012296 // GAB2 // GRB2-associated binding protein 2 // 11q14.1 // 9846 /// NM	GAB2	NM_012296	-2.44978	37.0156	15.1098
8139794	---		---	2.01914	9.42812	19.0367
7988348	---		---	2.32882	9.74856	22.7026
8112664	---		---	2.15097	11.009	23.6799
8072926	NM_005318 // H1F0 // H1 histone family, member 0 // 22q13.1 // 3005	H1F0	NM_005318	2.90167	126.569	367.262
7926541	---		---	2.43499	20.586	50.1268
7935144	---		---	2.02392	13.3919	27.1042
8052581	---		---	2.95219	17.9135	52.884
8150582	---		---	2.25611	15.1377	34.1523
8072727	---		---	2.12034	25.837	54.7832
7949719	NM_001040716 // PC // pyruvate carboxylase // 11q13.4-q13.5 // 5091 /// NM_02217	PC	NM_001040716	-2.07149	35.8396	17.3014
7918657	NM_015967 // PTPN22 // protein tyrosine phosphatase, non-receptor type 22 (lymph	PTPN22	NM_015967	-2.95164	35.4487	12.0098
8124911	NM_005514 // HLA-B // major histocompatibility complex, class I, B // 6p21.3 //	HLA-B	NM_005514	-2.00035	691.142	345.511
8047459	---		---	2.05163	5.14753	10.5608
8148206	---		---	2.0558	9.41393	19.3532
7981960	---		---	2.22689	9.61989	21.4225
8058869	NM_022648 // TNS1 // tensin 1 // 2q35-q36 // 7145 /// BC071905 // TNS1 // tensin	TNS1	NM_022648	-2.08217	50.374	24.193
7961083	NM_005127 // CLEC2B // C-type lectin domain family 2, member B // 12p13-p12 // 9	CLEC2B	NM_005127	-2.22104	79.9753	36.008
8075310	NM_002309 // LIF // leukemia inhibitory factor (cholinergic differentiation fact	LIF	NM_002309	-4.07267	53.3111	13.0899
7901359	---		---	2.18926	10.3508	22.6606
7905067	NM_003548 // HIST2H4A // histone cluster 2, H4a // 1q21 // 8370	HIST2H4A	NM_003548	3.12124	32.5133	101.482
7919627	NM_003548 // HIST2H4A // histone cluster 2, H4a // 1q21 // 8370	HIST2H4A	NM_003548	3.12124	32.5133	101.482
8039120	NM_206818 // OSCAR // osteoclast-associated receptor // 19q13.42 // 126014 /// N	OSCAR	NM_206818	-3.28688	54.7025	16.6427
8045007	---		---	2.07543	12.8866	26.7451
7927924	---		---	2.28001	13.6117	31.0348
7901948	NR_002612 // DLEU2 // deleted in lymphocytic leukemia, 2 // 13q14.3 // 8847 ///	DLEU2	NR_002612	2.22007	16.1575	35.8709
8116952	---		---	-3.09479	28.51	9.21225
8001070	XR_016836 // LOC644773 // ARP3 actin-related protein 3 homolog B pseudogene // 2	LOC644773	XR_016836	2.01635	10.2863	20.7408
8152367	---		---	2.20561	25.5262	56.3008
7942816	---		---	2.28822	26.1871	59.9218
8045163	---		---	2.88428	15.3685	44.3271
7982086	---		---	2.28234	7.37553	16.8335
8154215	---		---	2.14806	21.1615	45.4562
8085360	NM_003256 // TIMP4 // TIMP metallopeptidase inhibitor 4 // 3p25 // 7079	TIMP4	NM_003256	-2.39677	27.7597	11.5822
8124181	---		---	2.2555	16.3985	36.9867
8091715	NM_020169 // LXN // latexin // 3q25.32 // 56925	LXN	NM_020169	-3.15792	173.71	55.0078
7912887	NM_002403 // MFAP2 // microfibrillar-associated protein 2 // 1p36.1-p35 // 4237	MFAP2	NM_002403	-2.12303	57.4553	27.0629
8005761	---		---	2.32968	10.5279	24.5265
8055130	NM_004807 // HS6ST1 // heparan sulfate 6-O-sulfotransferase 1 // 2q21 // 9394 //	HS6ST1	NM_004807	2.12627	24.0937	51.2299
8175256	XM_001128419 // MGC16121 // hypothetical protein MGC16121 // Xq26.3 // 84848 ///	MGC16121	XM_001128419	-2.92458	142.417	48.6964
8067834	---		---	2.85736	11.5188	32.9134
7992293	NM_024600 // C16orf30 // chromosome 16 open reading frame 30 // 16p13.3 // 79652	C16orf30	NM_024600	-3.52824	79.5924	22.5587
8086218	---		---	2.81267	13.8188	38.8678
7918953	---		---	2.16176	15.2303	32.9243
7934093	---		---	2.009	28.1875	56.6287
8019954	NM_001039796 // FLJ35776 // hypothetical protein LOC649446 // 18p11.31 // 649446	FLJ35776	NM_001039796	-2.19311	80.0114	36.483
7954699	---		---	2.65155	10.8731	28.8306
8126432	NR_002906 // RNU3 // RNA, U3 small nucleolar // 17p12-p11 // 6067	RNU3	NR_002906	2.14745	23.395	50.2396
8122724	NM_025218 // ULBP1 // UL16 binding protein 1 // 6q25 // 80329 /// XR_019311 // L	ULBP1	NM_025218	-2.33216	31.0552	13.3161
7969563	---		---	2.60459	20.9754	54.6321
7982868	NM_024111 // CHAC1 // ChaC, cation transport regulator homolog 1 (E. coli) // 15	CHAC1	NM_024111	-2.61851	31.3303	11.9649
8091879	---		---	2.48016	19.1721	47.5498
8083467	---		---	2.03949	9.57152	19.521
8015208	XM_001127069 // KRTAP2-2 // keratin associated protein 2-2 // 17q12-q21 // 85296	KRTAP2-2	XM_001127069	2.27765	48.5197	110.511
8068610	---		---	2.28687	9.21936	21.0835
7953979	---		---	2.30744	15.8418	36.554
8048993	---		---	2.07177	12.3861	25.661
7939420	---		---	2.40686	23.4898	56.5367
7932304	---		---	2.242	10.2159	22.904
7914851	NM_022111 // CLSPN // claspin homolog (Xenopus laevis) // 1p34.2 // 63967 /// AF	CLSPN	NM_022111	2.44528	49.1417	120.165
8089283	---		---	2.29114	14.6515	33.5688
7979131	---		---	2.08409	11.0623	23.0548
7982074	---		---	2.07666	10.1728	21.1254
7978536	---		---	2.07528	17.8748	37.0952
8106960	---		---	2.63574	10.0099	26.3836
8150157	---		---	2.08058	11.1533	23.2053
8133008	---		---	2.21426	27.771	61.4922
8099302	---		---	2.10192	13.4089	28.1845
8103358	---		---	2.03589	8.43489	17.1725
8047457	---		---	2.63574	25.2677	66.5993
8095035	---		---	2.45594	11.1251	27.3227
7899811	---		---	2.00419	26.3785	52.8676
8127688	---		---	2.13365	16.0689	34.2854
7953685	---		---	2.03837	8.36523	17.0515
8013572	---		---	2.03452	12.6029	25.6408
8157229	---		---	3.38013	8.47419	28.6439
8011884	NM_033007 // NLRP1 // NLR family, pyrin domain containing 1 // 17p13.2 // 22861	NLRP1	NM_033007	-3.40156	41.6824	12.2539
7954344	NM_001009562 // LST-3TM12 // organic anion transporter LST-3b // 12p12.2 // 3388	LST-3TM12	NM_001009562	-3.90657	226.982	58.1027
8148184	NM_207006 // FAM83A // family with sequence similarity 83, member A // 8q24.13 /	FAM83A	NM_207006	-3.40479	94.2588	27.6841
7968732	---		---	2.13271	16.0351	34.1983
7904226	NM_018420 // SLC22A15 // solute carrier family 22 (organic cation transporter),	SLC22A15	NM_018420	-2.36976	62.6956	26.4565
7931928	---		---	2.0753	13.5906	28.2047
8142897	---		---	2.08868	10.6338	22.2107
7963986	NM_002870 // RAB13 // RAB13, member RAS oncogene family // 1q21.2 // 5872 /// X7	RAB13	NM_002870	-2.02314	158.61	78.3978
7907964	---		---	2.06002	7.29352	15.0248
7960874	NM_004054 // C3AR1 // complement component 3a receptor 1 // 12p13.31 // 719	C3AR1	NM_004054	-2.57517	28.8038	11.1852
8105645	---		---	2.00977	21.6624	43.5365
8121247	---		---	2.10113	11.7106	24.6055
7963333	NM_182507 // KRT80 // keratin 80 // 12q13.13 // 144501 /// BC065180 // KRT80 //	KRT80	NM_182507	-2.90906	44.79	15.3967
7941501	NM_003860 // BANF1 // barrier to autointegration factor 1 // 11q13.1 // 8815	BANF1	NM_003860	2.14061	88.3893	189.207
8006531	NM_144975 // SLFN5 // schlafen family member 5 // 17q12 // 162394 /// BC021238 /	SLFN5	NM_144975	-2.31257	428.309	185.209
8022439	---		---	2.31462	15.9693	36.9628
8015206	AJ296345 // KRTAP2-1 // keratin associated protein 2-1 // 17q12-q21 // 81872 ///	KRTAP2-1	AJ296345	2.32455	51.0894	118.76
8124922	---		---	2.02785	13.6749	27.7307
7982080	---		---	2.2164	17.7487	39.3382
8106814	---		---	2.1329	11.132	23.7435
8066818	---		---	2.37191	14.0849	33.408
7952335	NR_003125 // LOC85391 // RNA, small nucleolar // 11q23.3-q25 // 85391	LOC85391	NR_003125	2.30342	77.171	177.757
7942818	---		---	2.17168	16.7348	36.3426
8174767	AK000723 // FAM70A // family with sequence similarity 70, member A // Xq24 // 55	FAM70A	AK000723	3.58436	14.5608	52.1911
7984079	NM_001018007 // TPM1 // tropomyosin 1 (alpha) // 15q22.1 // 7168 /// NM_00101802	TPM1	NM_001018007	-2.61797	195.166	74.5488
8091558	---		---	2.294	16.9311	38.8401
7923440	---		---	2.00197	8.80018	17.6177
8015759	NM_006373 // VAT1 // vesicle amine transport protein 1 homolog (T. californica)	VAT1	NM_006373	-2.09949	435.392	207.38
7949172	NM_004579 // MAP4K2 // mitogen-activated protein kinase kinase kinase kinase 2 /	MAP4K2	NM_004579	-2.01446	38.5286	19.126
8122877	---		---	2.54704	20.9046	53.245
8151490	---		---	2.37031	11.5749	27.436
8050803	---		---	2.05526	13.8533	28.4722
7993296	XM_940659 // LOC440338 // hypothetical gene supported by AJ002784 // 16p13.12 //	LOC440338	XM_940659	-6.32073	102.695	16.2473
7917597	---		---	2.21976	11.3346	25.1602
7964720	---		---	2.11858	11.3419	24.0287
8065325	NM_001030009 // RPS15A // ribosomal protein S15a // 16p // 6210 /// NM_001019 //	RPS15A	NM_001030009	-2.8042	305.659	109.001
8110674	---		---	2.44015	10.9415	26.6988
8081034	---		---	2.11753	12.9525	27.4274
7998963	---		---	2.44677	13.0266	31.873
8110880	---		---	2.15901	18.958	40.9305
8133002	---		---	2.15901	18.958	40.9305
8061517	---		---	2.04965	17.3681	35.5984
8172084	---		---	2.03722	15.5286	31.6351
7997048	NM_007242 // DDX19B // DEAD (Asp-Glu-Ala-As) box polypeptide 19B // 16q22.1 // 1	DDX19B	NM_007242	-2.04128	180.293	88.3234
8173039	---		---	2.27124	13.3623	30.3489
8052303	---		---	2.24791	11.7052	26.3123
8112174	---		---	-2.04038	17.004	8.33374
8144669	NM_004462 // FDFT1 // farnesyl-diphosphate farnesyltransferase 1 // 8p23.1-p22 /	FDFT1	NM_004462	-3.57111	634.593	177.702
8049317	NM_003648 // DGKD // diacylglycerol kinase, delta 130kDa // 2q37.1 // 8527 /// N	DGKD	NM_003648	-3.10144	131.079	42.2637
8085358	---		---	-2.04416	44.5328	21.7854
7953695	---		---	2.03005	12.3144	24.9988
8133854	---		---	2.89627	8.21532	23.7937
7970989	BC037403 // SOHLH2 // spermatogenesis and oogenesis specific basic helix-loop-he	SOHLH2	BC037403	-2.13837	59.3928	27.7749
8111474	NM_031900 // AGXT2 // alanine-glyoxylate aminotransferase 2 // 5p13 // 64902 ///	AGXT2	NM_031900	-7.57704	91.0928	12.0222
8055275	---		---	2.31679	21.3603	49.4873
8103226	NM_152680 // TMEM154 // transmembrane protein 154 // 4q31.3 // 201799	TMEM154	NM_152680	-3.80209	311.258	81.865
8078380	XM_496634 // LOC344787 // similar to zinc finger protein 611 // 3p23 // 344787 /	LOC344787	XM_496634	-2.44051	39.0141	15.9861
7924325	---		---	2.44953	15.5977	38.2071
8081358	---		---	2.15957	22.0982	47.7226
7982066	---		---	2.1453	8.0424	17.2534
8134869	NM_002593 // PCOLCE // procollagen C-endopeptidase enhancer // 7q22 // 5118 ///	PCOLCE	NM_002593	-3.10314	190.342	61.3386
8026751	NM_138401 // FAM125A // family with sequence similarity 125, member A // 19p13.1	FAM125A	NM_138401	-2.25473	44.3709	19.679
8082786	---		---	2.11162	7.77583	16.4196
7980576	---		---	2.02746	8.20087	16.627
7975268	NM_001172 // ARG2 // arginase, type II // 14q24.1-q24.3 // 384 /// AY074489 // A	ARG2	NM_001172	-4.46004	64.9244	14.5569
8077668	NM_153482 // IL17RE // interleukin 17 receptor E // 3p25.3 // 132014 /// NM_1534	IL17RE	NM_153482	-2.38335	21.306	8.93951
8116932	NM_030948 // PHACTR1 // phosphatase and actin regulator 1 // 6p24.1 // 221692 //	PHACTR1	NM_030948	-2.023	31.6857	15.6628
8174474	NM_022977 // ACSL4 // acyl-CoA synthetase long-chain family member 4 // Xq22.3-q	ACSL4	NM_022977	-2.1811	444.056	203.593
7976838	---		---	2.2031	17.0497	37.5622
7935572	BC050574 // C10orf33 // chromosome 10 open reading frame 33 // 10q24.2 // 84795	C10orf33	BC050574	-2.07508	34.0495	16.4087
8088476	---		---	2.93	4.48183	13.1317
8122807	NM_005100 // AKAP12 // A kinase (PRKA) anchor protein (gravin) 12 // 6q24-q25 //	AKAP12	NM_005100	-2.25486	348.901	154.733
7916487	---		---	2.23725	20.0666	44.8939
7911136	---		---	2.11919	6.57623	13.9363
8055624	NM_014795 // ZFHX1B // zinc finger homeobox 1b // 2q22 // 9839 /// BC060819 // Z	ZFHX1B	NM_014795	-2.17501	61.168	28.1231
8072131	---		---	2.13047	19.8088	42.2022
8081210	NM_001004736 // OR5K1 // olfactory receptor, family 5, subfamily K, member 1 //	OR5K1	NM_001004736	2.34916	10.8334	25.4494
7932447	---		---	2.04864	14.4847	29.6739
8106986	NM_014899 // RHOBTB3 // Rho-related BTB domain containing 3 // 5q15 // 22836 ///	RHOBTB3	NM_014899	-2.12545	774.871	364.568
8122881	---		---	2.28547	25.3643	57.9694
8048079	---		---	2.94554	12.0285	35.4305
8129458	NM_033515 // ARHGAP18 // Rho GTPase activating protein 18 // 6q22.33 // 93663 //	ARHGAP18	NM_033515	-2.07533	160.709	77.4381
7934318	---		---	2.0162	11.032	22.2428
8111269	---		---	2.27927	10.7529	24.5088
7959267	NM_002560 // P2RX4 // purinergic receptor P2X, ligand-gated ion channel, 4 // 12	P2RX4	NM_002560	-2.91122	62.2403	21.3794
7935690	---		---	2.18847	19.5032	42.6823
8055269	---		---	2.74322	16.3101	44.7421
7957006	---		---	2.05608	11.9954	24.6636
8024170	NM_012292 // HMHA1 // histocompatibility (minor) HA-1 // 19p13.3 // 23526 /// AK	HMHA1	NM_012292	-2.80623	25.2437	8.9956
8028275	---		---	2.01369	27.1934	54.759
7928308	NM_019058 // DDIT4 // DNA-damage-inducible transcript 4 // 10pter-q26.12 // 5454	DDIT4	NM_019058	-4.58471	355.006	77.4326
8134676	---		---	2.35347	11.574	27.239
8011009	---		---	2.12076	7.54272	15.9963
8046408	NM_002610 // PDK1 // pyruvate dehydrogenase kinase, isozyme 1 // 2q31.1 // 5163	PDK1	NM_002610	-2.24831	253.348	112.684
8147748	---		---	2.20743	22.1187	48.8256
8131631	NM_014707 // HDAC9 // histone deacetylase 9 // 7p21.1 // 9734 /// NM_058176 // H	HDAC9	NM_014707	-4.10796	71.0031	17.2843
7964625	---		---	2.31502	17.2305	39.8889
8058199	---		---	2.32185	17.3839	40.3627
7918151	---		---	2.3429	21.4596	50.2777
8022500	---		---	2.49663	12.2821	30.6638
8095337	---		---	2.27924	18.7351	42.7017
8172280	NM_032591 // SLC9A7 // solute carrier family 9 (sodium/hydrogen exchanger), memb	SLC9A7	NM_032591	-2.37015	176.851	74.6158
7987534	---		---	2.02387	9.84853	19.9321
7919852	---		---	2.44026	24.3846	59.5048
8173928	---		---	2.22531	16.8078	37.4025
8010702	NM_024083 // ASPSCR1 // alveolar soft part sarcoma chromosome region, candidate	ASPSCR1	NM_024083	-2.19934	32.2105	14.6455
8120822	---		---	2.13284	11.7413	25.0424
8096333	---		---	2.24993	12.9947	29.2373
7980233	NM_002632 // PGF // placental growth factor, vascular endothelial growth factor-	PGF	NM_002632	-2.28514	38.3828	16.7967
8022247	---		---	2.19229	10.1849	22.3283
7983377	---		---	3.01546	12.1184	36.5425
8103364	---		---	2.25682	22.7721	51.3926
7982076	---		---	2.06034	14.1958	29.2481
7973820	---		---	2.09694	10.2304	21.4525
8017148	---		---	2.11758	12.431	26.3236
8144802	NM_006207 // PDGFRL // platelet-derived growth factor receptor-like // 8p22-p21.	PDGFRL	NM_006207	2.40175	20.0433	48.1389
8072575	---		---	2.12558	18.5398	39.4078
7951397	NM_001223 // CASP1 // caspase 1, apoptosis-related cysteine peptidase (interleuk	CASP1	NM_001223	-2.30036	28.5779	12.4232
7951807	NM_014333 // IGSF4 // immunoglobulin superfamily, member 4 // 11q23.2 // 23705 /	IGSF4	NM_014333	2.05116	13.9235	28.5593
8124036	---		---	2.12471	21.1571	44.9529
8043436	---		---	3.04264	6.78807	20.6537
7943892	NM_001076682 // NCAM1 // neural cell adhesion molecule 1 // 11q23.1 // 4684 ///	NCAM1	NM_001076682	2.73695	48.0732	131.574
7982014	---		---	2.31077	11.2486	25.9931
8124040	NM_000332 // ATXN1 // ataxin 1 // 6p23 // 6310 /// BC047894 // ATXN1 // ataxin 1	ATXN1	NM_000332	-2.14235	56.1495	26.2092
7911178	NM_004895 // NLRP3 // NLR family, pyrin domain containing 3 // 1q44 // 114548 //	NLRP3	NM_004895	-2.13716	68.5891	32.0936
8076734	NM_058238 // WNT7B // wingless-type MMTV integration site family, member 7B // 2	WNT7B	NM_058238	-2.11798	25.761	12.163
8044917	---		---	2.19085	10.979	24.0533
8121332	---		---	2.12515	8.77667	18.6517
7948332	NM_004811 // LPXN // leupaxin // 11q12.1 // 9404 /// BC034230 // LPXN // leupaxi	LPXN	NM_004811	-2.02201	46.3529	22.9242
8091877	---		---	2.54027	21.4799	54.5647
8051862	---		---	2.35755	11.6923	27.5653
8111677	NM_002310 // LIFR // leukemia inhibitory factor receptor alpha // 5p13-p12 // 39	LIFR	NM_002310	2.22859	67.5552	150.553
8094774	---		---	2.26479	25.4796	57.706
8010915	NM_182705 // FAM101B // family with sequence similarity 101, member B // 17p13 /	FAM101B	NM_182705	-2.94626	90.9094	30.8558
8097934	---		---	2.65533	9.63345	25.58
8021416	---		---	2.22772	8.46104	18.8488
7984255	---		---	2.45761	9.31414	22.8905
7949742	---		---	2.36293	14.505	34.2743
8069174	NM_058190 // C21orf70 // chromosome 21 open reading frame 70 // 21q22.3 // 85395	C21orf70	NM_058190	-2.10402	37.4145	17.7824
8082422	NM_021937 // EEFSEC // eukaryotic elongation factor, selenocysteine-tRNA-specifi	EEFSEC	NM_021937	2.04479	83.9715	171.704
8040171	---		---	2.1468	11.1638	23.9664
8112014	---		---	2.38795	10.1346	24.2008
8147752	---		---	2.09767	8.01132	16.8051
8088998	---		---	2.12389	14.3778	30.537
8097945	---		---	2.07847	15.7376	32.7102
8139806	---		---	2.03623	23.7131	48.2854
8151585	---		---	2.18776	13.3522	29.2114
8167951	---		---	2.11627	8.3207	17.6089
8135734	AY358220 // FLJ21986 // hypothetical protein FLJ21986 // 7q31.31 // 79974 /// BC	FLJ21986	AY358220	-3.02696	169.653	56.0473
7915592	NR_002755 // RNU5D // RNA, U5D small nuclear // 1p34.1 // 26830	RNU5D	NR_002755	-2.11891	121.148	57.1747
8102726	---		---	2.24163	9.17153	20.5592
8061066	---		---	2.15409	24.0783	51.8668
7980578	---		---	2.1622	15.9778	34.5472
8005763	---		---	2.57142	22.5299	57.9338
8138483	---		---	2.62222	23.5751	61.8191
8018823	NM_007267 // TMC6 // transmembrane channel-like 6 // 17q25.3 // 11322 /// BC0077	TMC6	NM_007267	-2.00415	28.6823	14.3115
7924461	---		---	2.08288	8.22506	17.1318
8048368	NR_002906 // RNU3 // RNA, U3 small nucleolar // 17p12-p11 // 6067	RNU3	NR_002906	2.04889	21.0689	43.1678
7942814	---		---	2.20672	20.0886	44.33
8008780	---		---	2.13347	5.58976	11.9256
7989094	NM_006154 // NEDD4 // neural precursor cell expressed, developmentally down-regu	NEDD4	NM_006154	-2.13587	251.366	117.688
8055490	---		---	2.20701	36.8569	81.3435
8092765	---		---	-2.01876	377.827	187.158
8070601	---		---	2.50647	8.05075	20.179
8019392	NM_004104 // FASN // fatty acid synthase // 17q25 // 2194	FASN	NM_004104	-2.4651	299.121	121.342
8156339	---		---	2.31004	20.9784	48.4609
7945573	NM_021128 // POLR2L // polymerase (RNA) II (DNA directed) polypeptide L, 7.6kDa	POLR2L	NM_021128	2.10986	189.047	398.861
7997139	NM_007088 // CALB2 // calbindin 2, 29kDa (calretinin) // 16q22.2 // 794 /// NM_0	CALB2	NM_007088	-2.45856	26.1943	10.6543
8112607	---		---	2.14683	10.8701	23.3362
8091875	---		---	2.24433	12.5959	28.2694
8047559	---		---	2.50595	15.8263	39.6601
7956301	NM_002332 // LRP1 // low density lipoprotein-related protein 1 (alpha-2-macroglo	LRP1	NM_002332	-3.40959	99.9885	29.3257
7940643	NM_025080 // ASRGL1 // asparaginase like 1 // 11q12.3 // 80150 /// BC006267 // A	ASRGL1	NM_025080	2.45619	15.2724	37.5119
8099719	---		---	2.03561	12.9977	26.4582
7982036	---		---	2.0888	7.73758	16.1622
7976067	---		---	2.09409	8.64163	18.0963
8139656	NM_001001555 // GRB10 // growth factor receptor-bound protein 10 // 7p12-p11.2 /	GRB10	NM_001001555	-3.05963	131.293	42.9115
8068478	NM_005441 // CHAF1B // chromatin assembly factor 1, subunit B (p60) // 21q22.13	CHAF1B	NM_005441	2.38337	68.3024	162.79
7956759	NM_020762 // SRGAP1 // SLIT-ROBO Rho GTPase activating protein 1 // 12q14.2 // 5	SRGAP1	NM_020762	-2.07394	246.168	118.696
8078330	NM_001003792 // RBMS3 // RNA binding motif, single stranded interacting protein	RBMS3	NM_001003792	-2.0673	261.746	126.613
7981978	NR_001290 // SNRPN // small nuclear ribonucleoprotein polypeptide N // 15q11.2 /	SNRPN	NR_001290	-2.84712	25.8781	9.08922
8173308	---		---	2.0554	12.1409	24.9544
8173362	---		---	2.10856	12.6554	26.6846
8019357	NM_016286 // DCXR // dicarbonyl/L-xylulose reductase // 17q25.3 // 51181 /// CR6	DCXR	NM_016286	3.29076	107.157	352.628
8139812	---		---	2.40641	13.4857	32.4522
8168468	---		---	2.28977	14.3198	32.789
8176280	---		---	2.28977	14.3198	32.789
8006502	---		---	2.07204	17.3998	36.0532
7965322	NM_000899 // KITLG // KIT ligand // 12q22 // 4254 /// NM_003994 // KITLG // KIT	KITLG	NM_000899	2.21012	29.204	64.5444
8102862	NM_018717 // MAML3 // mastermind-like 3 (Drosophila) // 4q28 // 55534	MAML3	NM_018717	-2.12685	95.38	44.8457
8057561	---		---	2.01165	10.139	20.3962
7920600	NM_003029 // SHC1 // SHC (Src homology 2 domain containing) transforming protein	SHC1	NM_003029	-2.0055	131.151	65.3959
7917503	NM_018284 // GBP3 // guanylate binding protein 3 // 1p22.2 // 2635 /// AK001823	GBP3	NM_018284	-2.22491	79.8684	35.8974
7942596	NM_001235 // SERPINH1 // serpin peptidase inhibitor, clade H (heat shock protein	SERPINH1	NM_001235	-4.31624	161.744	37.4733
7961624	---		---	2.1082	17.8557	37.6433
8173158	---		---	2.80497	11.166	31.3204
8089015	NM_000313 // PROS1 // protein S (alpha) // 3q11.2 // 5627 /// BC015801 // PROS1	PROS1	NM_000313	-2.57499	175.728	68.2441
8083494	NM_007288 // MME // membrane metallo-endopeptidase (neutral endopeptidase, enkep	MME	NM_007288	-2.17235	1695.56	780.516
8171381	NM_001018113 // FANCB // Fanconi anemia, complementation group B // Xp22.2 // 21	FANCB	NM_001018113	2.02868	31.0328	62.9555
8044911	---		---	2.35104	12.1058	28.4611
8133040	---		---	2.59996	18.0763	46.9977
8060344	NM_021158 // TRIB3 // tribbles homolog 3 (Drosophila) // 20p13-p12.2 // 57761 //	TRIB3	NM_021158	-2.73379	87.5289	32.0174
8079588	---		---	2.08153	9.75022	20.2954
8013448	---		---	2.16337	7.99675	17.3
8113350	---		---	2.26071	26.204	59.2397
8171199	---		---	2.2084	17.2053	37.9962
8005757	---		---	2.49838	16.833	42.0552
8104648	---		---	2.05074	9.09387	18.6492
8147754	---		---	2.74851	20.5077	56.3657
7957733	---		---	3.0312	12.4263	37.6665
8064100	NM_024299 // C20orf149 // chromosome 20 open reading frame 149 // 20q13.33 // 79	C20orf149	NM_024299	2.02459	68.0667	137.807
7907893	NM_001531 // MR1 // major histocompatibility complex, class I-related // 1q25.3	MR1	NM_001531	-2.84692	90.5632	31.811
7905733	NM_001018837 // HAX1 // HCLS1 associated protein X-1 // 1q21.3 // 10456 /// NM_0	HAX1	NM_001018837	-2.08081	174.892	84.0498
8022642	NR_002906 // RNU3 // RNA, U3 small nucleolar // 17p12-p11 // 6067	RNU3	NR_002906	2.39061	14.521	34.7141
8140668	NM_006080 // SEMA3A // sema domain, immunoglobulin domain (Ig), short basic doma	SEMA3A	NM_006080	-2.15184	107.105	49.7738
8046906	NM_016315 // GULP1 // GULP, engulfment adaptor PTB domain containing 1 // 2q32.3	GULP1	NM_016315	-2.14642	69.6319	32.4409
7981333	---		---	3.00294	8.07569	24.2508
8102800	NM_014331 // SLC7A11 // solute carrier family 7, (cationic amino acid transporte	SLC7A11	NM_014331	-3.19162	650.494	203.813
7905058	XM_001133559 // LOC644634 // hypothetical LOC644634 // 1q21.1 // 644634 /// XM_0	LOC644634	XM_001133559	-2.37231	34.6413	14.6023
8120719	NM_133493 // CD109 // CD109 molecule // 6q13 // 135228	CD109	NM_133493	-2.72059	293.561	107.903
7969677	NM_144778 // MBNL2 // muscleblind-like 2 (Drosophila) // 13q32.1 // 10150 /// NM	MBNL2	NM_144778	-2.02009	349.59	173.057
8060893	---		---	2.07935	5.25319	10.9232
8112647	---		---	2.02401	19.1963	38.8536
7970033	NM_001846 // COL4A2 // collagen, type IV, alpha 2 // 13q34 // 1284 /// BC035559	COL4A2	NM_001846	-2.04798	122.052	59.5965
8124518	NM_021066 // HIST1H2AJ // histone cluster 1, H2aj // 6p22-p21.3 // 8331	HIST1H2AJ	NM_021066	2.06976	11.1205	23.0168
7915472	NM_006516 // SLC2A1 // solute carrier family 2 (facilitated glucose transporter)	SLC2A1	NM_006516	-2.22068	729.6	328.548
7972016	---		---	2.31681	9.97172	23.1026
8061564	NM_181353 // ID1 // inhibitor of DNA binding 1, dominant negative helix-loop-hel	ID1	NM_181353	2.39174	133.259	318.721
7988258	---		---	2.30518	16.2326	37.419
8113354	---		---	2.00629	13.1024	26.2871
8114536	---		---	-2.28336	181.768	79.6055
8066210	---		---	2.30512	4.79728	11.0583
8047561	---		---	2.71882	13.0828	35.5699
8047788	NM_003812 // ADAM23 // ADAM metallopeptidase domain 23 // 2q33 // 8745 /// AJ005	ADAM23	NM_003812	2.47378	13.1292	32.4788
8089011	XR_018265 // LOC648124 // similar to Vitamin K-dependent protein S precursor //	LOC648124	XR_018265	-2.51077	111.69	44.4846
7940565	NM_004265 // FADS2 // fatty acid desaturase 2 // 11q12-q13.1 // 9415 /// AF10865	FADS2	NM_004265	-6.82033	281.762	41.312
8132725	NM_003364 // UPP1 // uridine phosphorylase 1 // 7p12.3 // 7378 /// NM_181597 //	UPP1	NM_003364	-2.53051	59.0492	23.3349
7925500	NM_001821 // CHML // choroideremia-like (Rab escort protein 2) // 1q42-qter // 1	CHML	NM_001821	-2.80961	163.576	58.2202
7987772	NM_139265 // EHD4 // EH-domain containing 4 // 15q11.1 // 30844	EHD4	NM_139265	-2.03318	305.164	150.092
8016476	NM_024017 // HOXB9 // homeobox B9 // 17q21.3 // 3219	HOXB9	NM_024017	-2.48848	98.9621	39.7681
7948839	NM_006362 // NXF1 // nuclear RNA export factor 1 // 11q12-q13 // 10482 /// AB209	NXF1	NM_006362	2.10827	192.857	406.593
8046016	NR_002906 // RNU3 // RNA, U3 small nucleolar // 17p12-p11 // 6067	RNU3	NR_002906	2.08153	21.7503	45.2739
8128445	---		---	2.22675	7.63456	17.0003
8086961	NM_004567 // PFKFB4 // 6-phosphofructo-2-kinase/fructose-2,6-biphosphatase 4 //	PFKFB4	NM_004567	-4.01679	75.557	18.8103
8077441	NM_003670 // BHLHB2 // basic helix-loop-helix domain containing, class B, 2 // 3	BHLHB2	NM_003670	-3.28576	296.182	90.1411
8116980	NM_152737 // RNF182 // ring finger protein 182 // 6p23 // 221687 /// AK090576 //	RNF182	NM_152737	2.42836	15.5104	37.6649
8036418	---		---	2.23406	15.232	34.0292
8045157	---		---	2.31066	12.4172	28.6918
7983189	---		---	3.99153	11.5065	45.9284
8100574	---		---	2.63091	16.3658	43.0571
8055909	---		---	2.1806	6.9677	15.1938
7974335	---		---	-3.23988	162.087	50.0286
8084717	NM_003032 // ST6GAL1 // ST6 beta-galactosamide alpha-2,6-sialyltranferase 1 // 3	ST6GAL1	NM_003032	-4.78824	227.608	47.5348
7982100	---		---	2.59967	12.6592	32.9096
8118310	NM_005345 // HSPA1A // heat shock 70kDa protein 1A // 6p21.3 // 3303 /// AK09711	HSPA1A	NM_005345	5.21169	120.571	628.376
8088664	NM_003848 // SUCLG2 // succinate-CoA ligase, GDP-forming, beta subunit // 3p14.1	SUCLG2	NM_003848	-2.02398	368.139	181.889
7957386	NM_024560 // FLJ21963 // FLJ21963 protein // 12q21.31 // 79611 /// AK074938 // F	FLJ21963	NM_024560	-3.54187	108.196	30.5478
8124380	NM_005325 // HIST1H1A // histone cluster 1, H1a // 6p21.3 // 3024	HIST1H1A	NM_005325	3.07155	40.8143	125.363
8155458	XR_016192 // LOC392322 // similar to recombining binding protein suppressor of h	LOC392322	XR_016192	-2.26998	102.726	45.2542
8179322	NM_005345 // HSPA1A // heat shock 70kDa protein 1A // 6p21.3 // 3303 /// AK09711	HSPA1A	NM_005345	5.28374	116.815	617.221
8014861	---		---	2.3309	8.56926	19.9741
8083677	NM_014575 // SCHIP1 // schwannomin interacting protein 1 // 3q25.33 // 29970 ///	SCHIP1	NM_014575	-2.0736	296.467	142.972
8080964	NM_174907 // PPP4R2 // protein phosphatase 4, regulatory subunit 2 // 3p13 // 15	PPP4R2	NM_174907	-2.09107	139.386	66.6574
7932960	---		---	3.87812	8.35062	32.3847
8123678	AJ420534 // C6orf145 // chromosome 6 open reading frame 145 // 6p25.2 // 221749	C6orf145	AJ420534	-2.29046	113.381	49.5015
8138308	---		---	2.61466	15.1814	39.6942
8144717	---		---	-2.87314	68.3273	23.7814
7980113	---		---	2.21815	9.05057	20.0756
7986515	XM_001129640 // LOC729197 // similar to Dynamin-1 (D100) (Dynamin, brain) (B-dyn	LOC729197	XM_001129640	-2.3804	63.1664	26.5361
7986525	XM_001129640 // LOC729197 // similar to Dynamin-1 (D100) (Dynamin, brain) (B-dyn	LOC729197	XM_001129640	-2.3804	63.1664	26.5361
8003859	---		---	2.47028	14.8116	36.5889
7951337	---		---	2.01147	13.2476	26.647
7952205	NM_006500 // MCAM // melanoma cell adhesion molecule // 11q23.3 // 4162 /// M292	MCAM	NM_006500	-2.42705	132.526	54.6037
8056257	NM_022168 // IFIH1 // interferon induced with helicase C domain 1 // 2p24.3-q24.	IFIH1	NM_022168	-12.6532	104.239	8.23816
7983734	NM_014548 // TMOD2 // tropomodulin 2 (neuronal) // 15q21.1-q21.2 // 29767	TMOD2	NM_014548	2.01136	29.1699	58.6711
7913655	NM_002167 // ID3 // inhibitor of DNA binding 3, dominant negative helix-loop-hel	ID3	NM_002167	2.0732	37.5628	77.8755
7972750	NM_001845 // COL4A1 // collagen, type IV, alpha 1 // 13q34 // 1282 /// CR593711	COL4A1	NM_001845	-2.92698	86.9479	29.7056
8070255	---		---	2.50029	9.03684	22.5947
7949412	NM_021070 // LTBP3 // latent transforming growth factor beta binding protein 3 /	LTBP3	NM_021070	-2.24871	126.578	56.2892
7906613	NM_021181 // SLAMF7 // SLAM family member 7 // 1q23.1-q24.1 // 57823 /// BC02786	SLAMF7	NM_021181	-2.02823	17.8138	8.78296
7961365	NM_018050 // MANSC1 // MANSC domain containing 1 // 12p13.2 // 54682	MANSC1	NM_018050	-2.19588	102.618	46.7322
8115327	NM_003118 // SPARC // secreted protein, acidic, cysteine-rich (osteonectin) // 5	SPARC	NM_003118	-2.26418	652.418	288.147
7981988	NR_003106 // PWCR1 // Prader-Willi syndrome chromosome region 1 // 15q11.2 // 63	PWCR1	NR_003106	-2.63245	19.849	7.54012
8025601	NM_000201 // ICAM1 // intercellular adhesion molecule 1 (CD54), human rhinovirus	ICAM1	NM_000201	-10.4449	152.028	14.5552
8118314	NM_005346 // HSPA1B // heat shock 70kDa protein 1B // 6p21.3 // 3304 /// AK09711	HSPA1B	NM_005346	5.78711	73.2643	423.989
8058340	---		---	-2.80043	485.426	173.34
8178086	NM_005346 // HSPA1B // heat shock 70kDa protein 1B // 6p21.3 // 3304 /// AK09711	HSPA1B	NM_005346	5.84315	72.1285	421.457
8179324	NM_005346 // HSPA1B // heat shock 70kDa protein 1B // 6p21.3 // 3304 /// AK09711	HSPA1B	NM_005346	5.84315	72.1285	421.457
8113709	NM_002317 // LOX // lysyl oxidase // 5q23.2 // 4015	LOX	NM_002317	-5.77538	485.193	84.0105
8096331	---		---	2.01429	28.3934	57.1928
8147777	NM_138455 // CTHRC1 // collagen triple helix repeat containing 1 // 8q22.3 // 11	CTHRC1	NM_138455	-2.3195	89.8381	38.7316
8091402	NM_138786 // TM4SF18 // transmembrane 4 L six family member 18 // 3q25.1 // 1164	TM4SF18	NM_138786	-10.5395	155.604	14.7639
8104901	NM_002185 // IL7R // interleukin 7 receptor // 5p13 // 3575 /// XM_001127146 //	IL7R	NM_002185	-2.53357	38.8305	15.3264
8124430	NM_005320 // HIST1H1D // histone cluster 1, H1d // 6p21.3 // 3007 /// BC111971 /	HIST1H1D	NM_005320	2.07827	72.8485	151.399
8132998	---		---	-2.19181	96.1402	43.8634
7963786	NM_002205 // ITGA5 // integrin, alpha 5 (fibronectin receptor, alpha polypeptide	ITGA5	NM_002205	-2.02558	412.833	203.809
8096301	NM_001040060 // SPP1 // secreted phosphoprotein 1 (osteopontin, bone sialoprotei	SPP1	NM_001040060	-12.5134	212.107	16.9503
8086752	X58062 // RNU13P3 // RNA, U13 small nuclear pseudogene 3 // --- // 6078 /// NR_0	RNU13P3	X58062	-2.24376	90.0322	40.1256
7910377	---		---	-2.09441	30.2869	14.4608
8173156	---		---	-2.04242	53.3935	26.1422
8165682	---		---	-2.21824	799.122	360.25
8163637	NM_002160 // TNC // tenascin C (hexabrachion) // 9q33 // 3371 /// BX641111 // TN	TNC	NM_002160	-4.13672	473.338	114.423
8165496	---		---	2.4815	11.6586	28.931
